# Supplementary material for: A hierarchically assembled 88-nuclei silver-thiacalix[4]arene nanocluster
Source: PubMed Central journal article supplement (PMC6965622; doi:10.1038/s41467-019-13682-5), 2020-01-16
Supplement: 41467_2019_13682_MOESM1_ESM.pdf [file 41467_2019_13682_MOESM1_ESM.pdf]

# **Supplementary Information**

## **A Hierarchically Assembled 88-Nuclei Silver-Thiacalix[4]arene Nanocluster**

Wang et al

## **Supplementary Methods.**

### **Materials and reagents**

The (EtSAg)<sub>n</sub><sup>1</sup> and *p-tert*-butylthiacalix[4]arene (H<sub>4</sub>TC4A)<sup>2</sup> were prepared by following the reported procedure. EtSH (Adamas-beta®) and AgOAc (Adamas-beta®) were purchased from Shanghai Titan Scientific Co.,Ltd. All other chemicals and solvents used in the syntheses were of analytical grade and used without further purification.

### **Elemental analysis**

The elemental analyses (C, H, N contents) were determined on a Vario EL III analyzer.

### **Fourier transform infrared spectroscopy (FTIR)**

FTIR spectra were recorded on a Bruker Tensor II spectrophotometer (Bruker Optics GmbH, Ettlingen, Germany) utilizing a single attenuated total reflectance (ATR) accessory covering a wavenumber range from 400 to 4000 cm<sup>-1</sup>. The final spectrum was the average of 32 scans accumulated using Bruker's Opus software 8.1, taken at 4 cm<sup>-1</sup> resolution. The samples were measured under the same mechanical force pushing the samples in contact with the diamond window.

### **UV/Vis spectroscopy**

The diffuse-reflectance spectra were performed on UV-Vis spectrophotometer (Evolution 220, ISA-220 accessory, Thermo Scientific) using a built-in 10 mm silicon photodiode with a 60 mm Spectralon sphere.

### **Transmission electron microscopy (TEM)**

High-resolution TEM images were recorded on a FEI TALOS F200 transmission electron microscope operating at 200 kV. Several crystals of **SD/Ag88a** were dissolved in dichloromethane or dispersed in ethanol under the ultrasound condition. The solution or emulsion was dropped onto the ultrathin carbon film with a pipette, and then left to dry and observed under a transmission electron microscope.

### **Dynamic light scattering (DLS)**

The diameters of **SD/Ag88a** were measured by DLS using a Zetasizer Nano ZS90 (Malvern Instruments, UK). The measurements were conducted at a scattering angle

of 90° at 25 °C. The measurements were repeated thrice for each sample.

### **Elemental mapping images**

Morphology of the samples and elemental composition analyses were measured using an SU-8010 field emission scanning electron microscope (FESEM; Hitachi Ltd., Tokyo, Japan) equipped with an Oxford-Horiba Inca XMax50 energy dispersive X-ray spectroscopy (EDS) attachment (Oxford Instruments Analytical, High Wycombe, England).

### **Thermogravimetric analysis (TGA)**

Thermogravimetric analysis (TGA) was done in a TA SDT Q600 thermal analyzer at a heating rate of 20°C/min under N<sub>2</sub> atmosphere (200 mL/min) from 20 to 800 °C.

### **Powder X-ray diffraction (PXRD)**

Powder X-ray diffraction (PXRD) analyses were carried out on a microcrystalline powder using a Rigaku Oxford Diffraction XtaLAB Synergy-S diffractometer using Cu radiation ( $\lambda = 1.54184 \text{ \AA}$ ). The PXRD patterns were processed with the *CrysAlis<sup>Pro</sup>* software suite<sup>3</sup> using the Powder function.

### **Mass spectra**

Mass spectra were recorded on an Agilent 6224 (Agilent Technologies, USA) ESI-TOF-MS spectrometer. Sample solutions are infused by a syringe pump at 4  $\mu\text{L}/\text{min}$ . Data were acquired using the following settings: ESI capillary voltage was set at 3500 V (–) ion mode and fragmentor at 200 V. The liquid nebulizer was set to 15 psig and the nitrogen drying gas was set to a flow rate of 4 L/min. Drying gas temperature was maintained at 150 °C. The data analyses of mass spectra were performed based on the isotope distribution patterns using Agilent MassHunter Workstation Data acquisition software (Version B.05.00). The reported  $m/z$  values represent monoisotopic mass of the most abundant peak within the isotope pattern.

### **Photocurrent measurement**

The photocurrent test was carried out on a CHI660E electrochemistry workstation. The crystals (10 mg) of (EtSAg)<sub>n</sub>, **SD/Ag88a** or **SD/Ag88b** and naphthol (0.5 wt. %, 10  $\mu\text{L}$ ) were dispersed in 0.5 mL ethanol, the mixture was sonicated for about 30 min. Then a 40  $\mu\text{L}$  solution was transferred by pipet dropped on the cleaned ITO glass and

the coated film was obtained after evaporation under ambient atmosphere. The prepared ITO glass film was used as working electrode, a Pt wire as the counter electrode, and an Ag/AgCl electrode as the reference electrode. A Na<sub>2</sub>SO<sub>4</sub> aqueous solution (0.2 M) was used as the medium.

### Supplementary Note.

Single crystals of **SD/Ag88a** and **SD/Ag88b** with appropriate dimensions were chosen under an optical microscope and quickly coated with high vacuum grease (Dow Corning Corporation) to prevent decomposition. Single-crystal X-ray diffraction data of **SD/Ag88a** and **SD/Ag88b** were collected on a Rigaku Oxford Diffraction XtaLAB Synergy diffractometer equipped with a HyPix-6000HE area detector at 100 K using Mo K $\alpha$  ( $\lambda = 0.71073 \text{ \AA}$ ) and Cu K $\alpha$  ( $\lambda = 1.54184 \text{ \AA}$ ) from PhotonJet micro-focus X-ray Source. The diffraction images were processed and scaled using the *CrysAlis<sup>Pro</sup>* software suite.<sup>3</sup> The structure was solved using the charge-flipping algorithm, as implemented in the program *SUPERFLIP*<sup>4</sup> and refined by full-matrix least-squares techniques against  $F_o^2$  using the SHELXL program<sup>5</sup> through the OLEX2 interface.<sup>6</sup> Hydrogen atoms at carbon were placed in calculated positions and refined isotropically by using a riding model. Appropriate restraints or constraints were applied to the geometry and the atomic displacement parameters of the atoms in the cluster. All structures were examined using the Addsym subroutine of PLATON<sup>7</sup> to ensure that no additional symmetry could be applied to the models. Pertinent crystallographic data collection and refinement parameters are collated in Supplementary Table 1. Selected bond lengths and angles are collated in Supplementary Table 2.

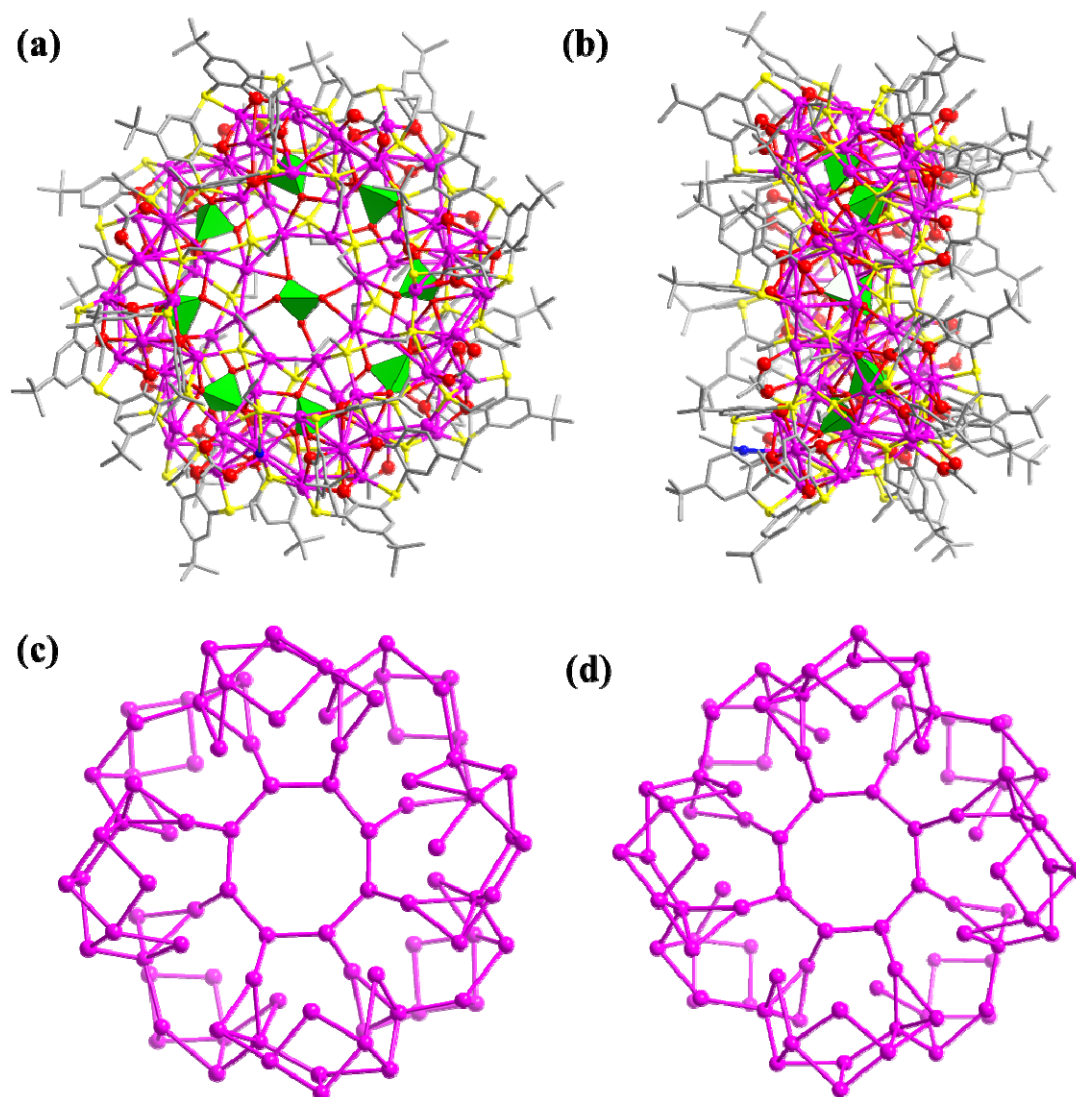

**Supplementary Figure 1:** Single-crystal X-ray structure of **SD/Ag88b**. (a) and (b) Total structures of **SD/Ag88b** viewed along two orthogonal directions. The compared views of the skeletal structures of **SD/Ag88b** (c) and **SD/Ag88a** (d) by removing all organic ligands and anion templates. Color labels: purple, Ag; yellow, S; gray, C; red, O; blue, N; green polyhedra, CrO<sub>4</sub><sup>2-</sup>.

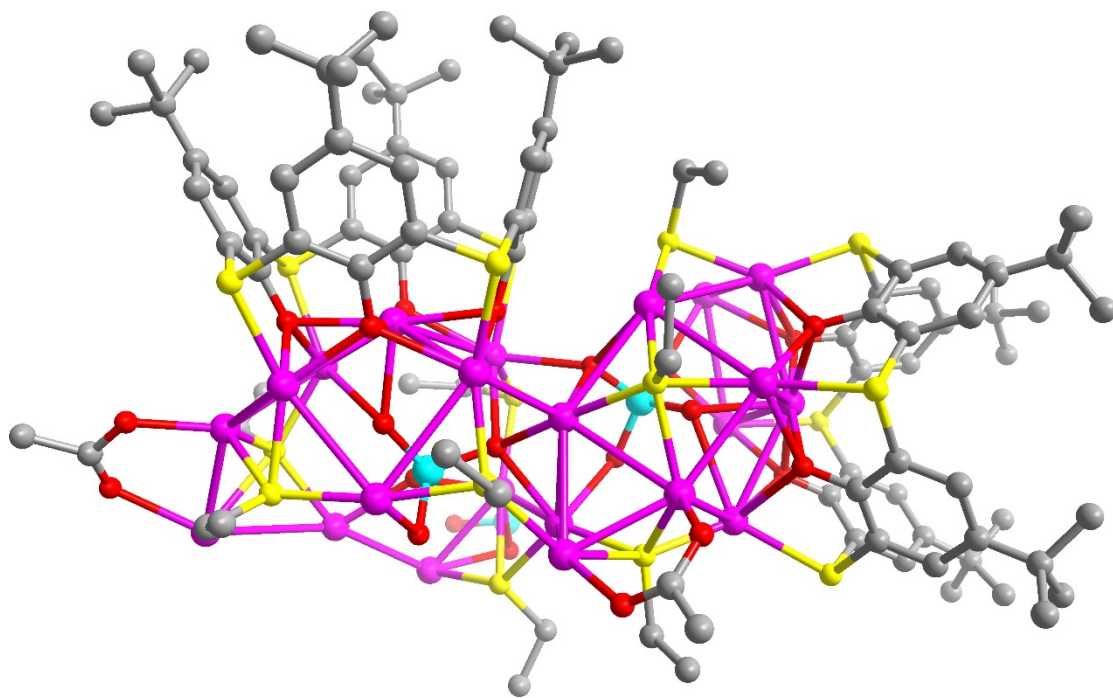

**Supplementary Figure 2:** The structure in an asymmetric unit of **SD/Ag88a**.

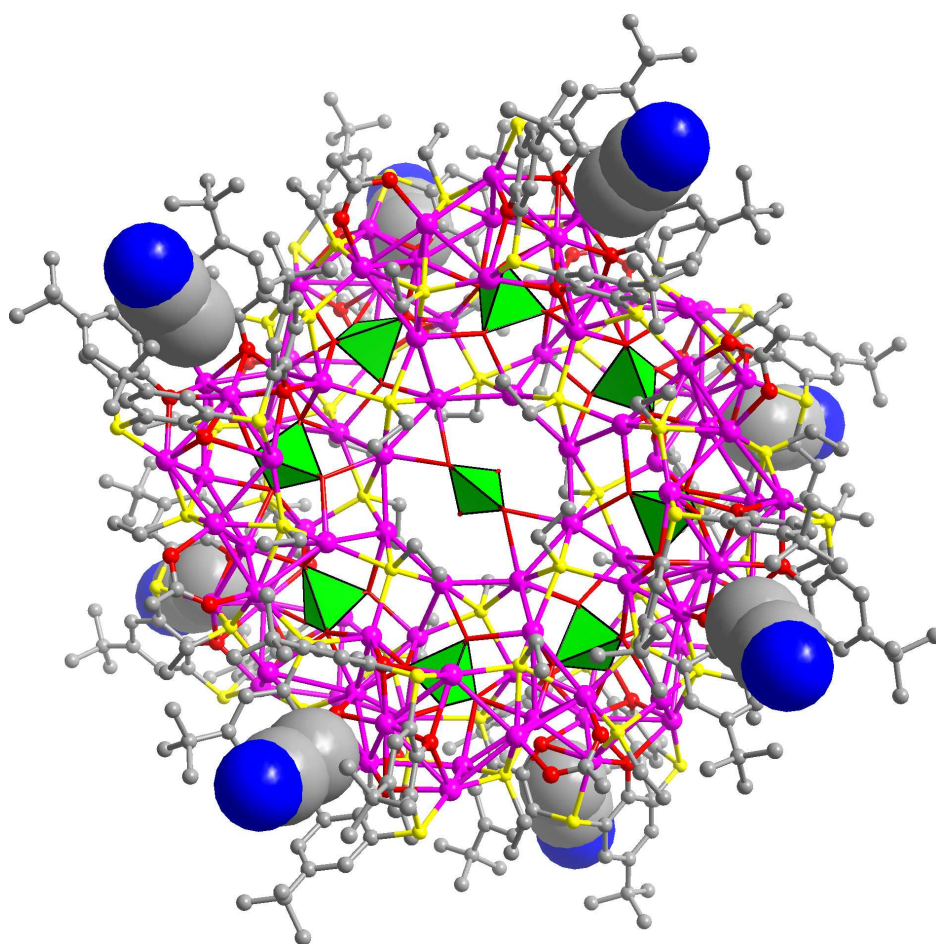

**Supplementary Figure 3:** The molecular structure of **SD/Ag88a** with each  $\text{TC4A}^+$  trapping one  $\text{CH}_3\text{CN}$  molecule.



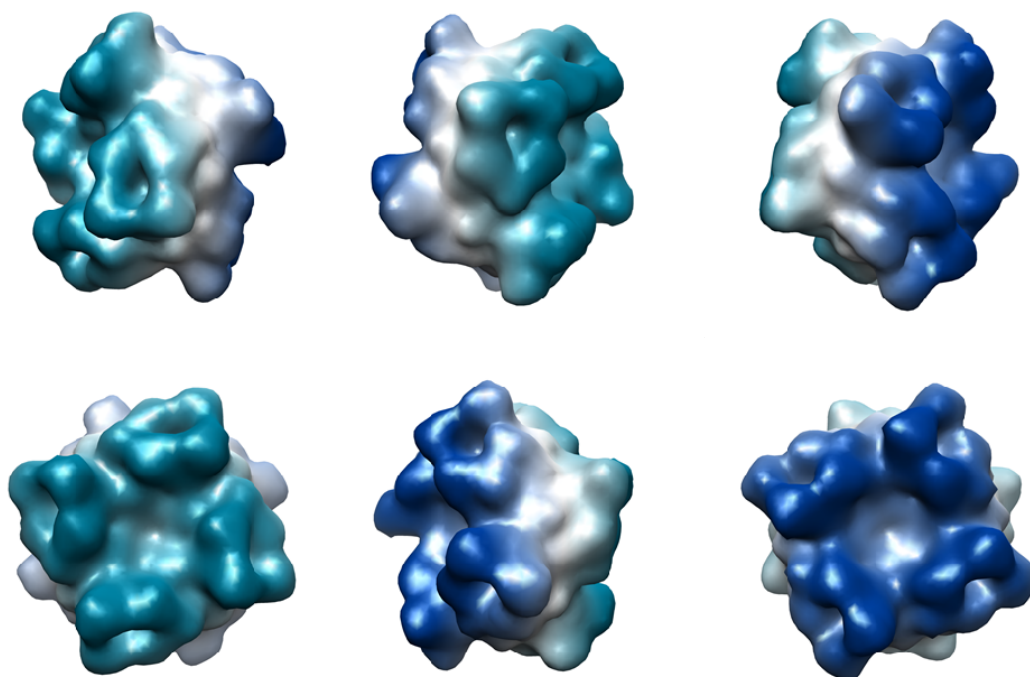

**Supplementary Figure 4:** The surface of **SD/Ag88a** calculated via 3V Volume Assessor program<sup>8</sup> by rolling a virtual probe (0.8 Å) on the surface viewed along six different orientations.

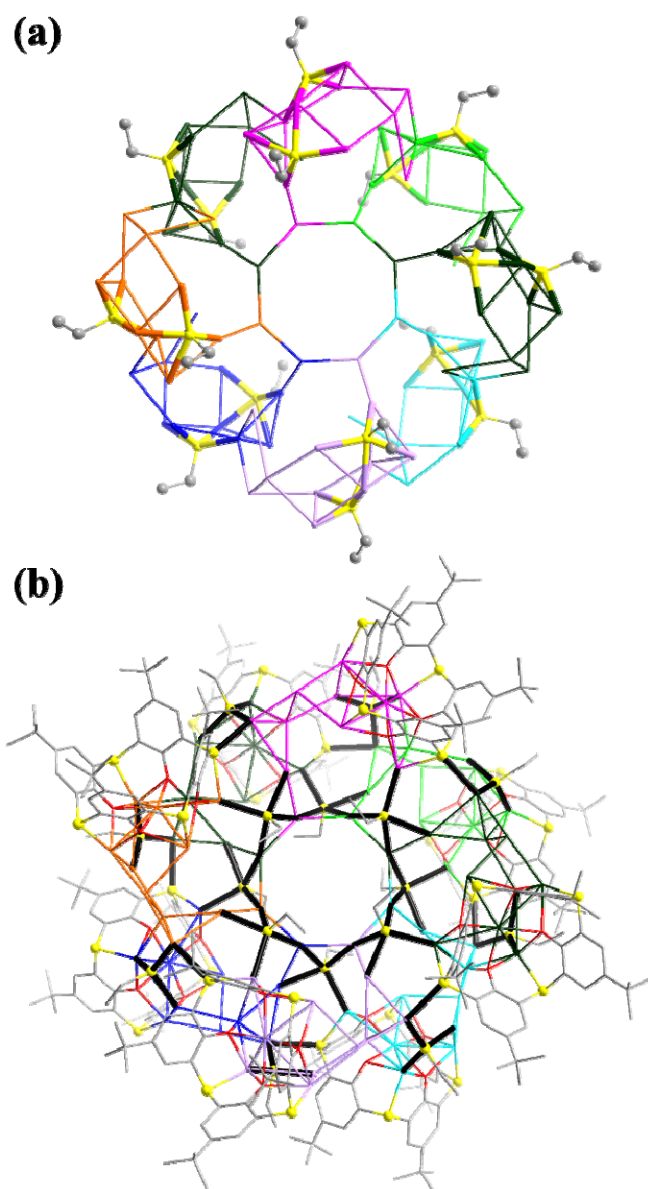

**Supplementary Figure 5:** The ligand distributions in each Ag<sub>11</sub> SBU and between adjacent Ag<sub>11</sub> SBUs. **(a)** The  $\mu_4$ -EtS<sup>-</sup> ligands capping on each Ag<sub>11</sub> SBU. **(b)** The EtS<sup>-</sup> and TC4A<sup>4-</sup> ligands linking adjacent Ag<sub>11</sub> SBUs. The Ag-S bonds linking adjacent Ag<sub>11</sub> SBUs are represented by black bold lines.

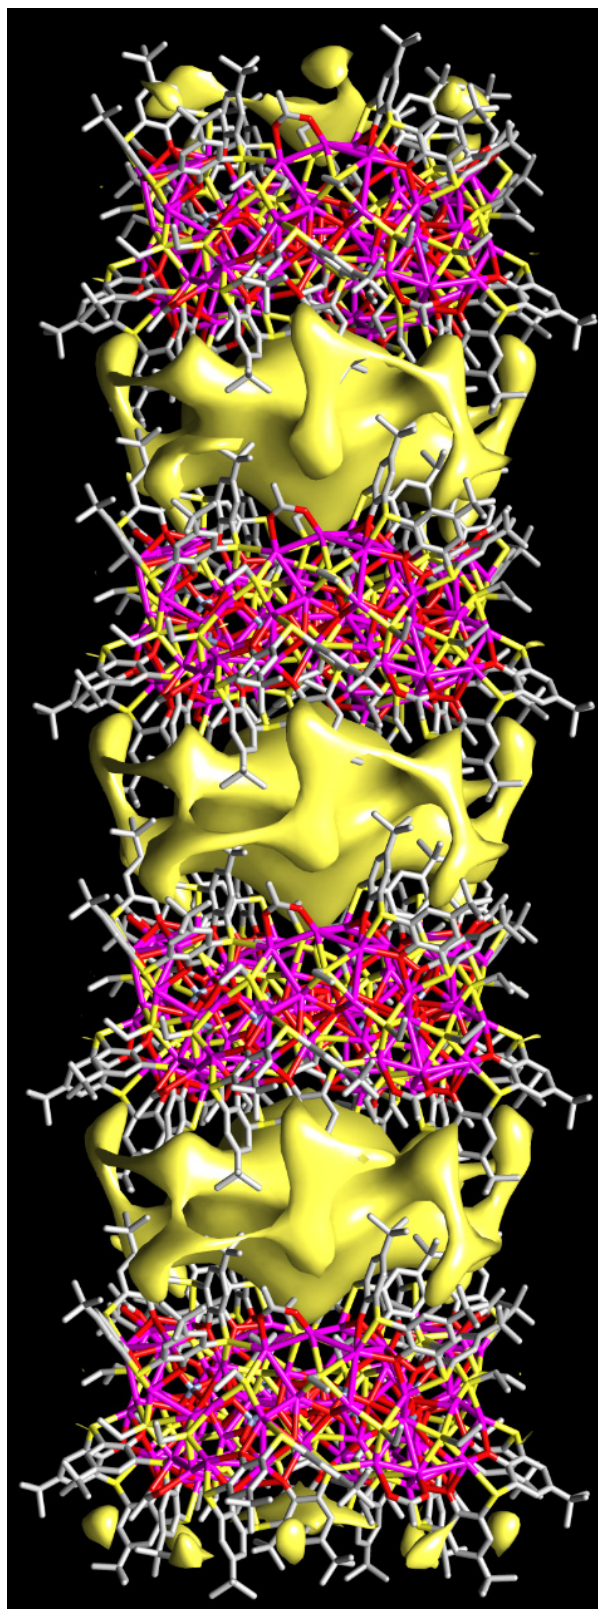

**Supplementary Figure 6:** The solvent-accessible voids of SD/Ag88a packed into one-dimensional column calculated via 3V Volume Assessor program.<sup>8</sup>

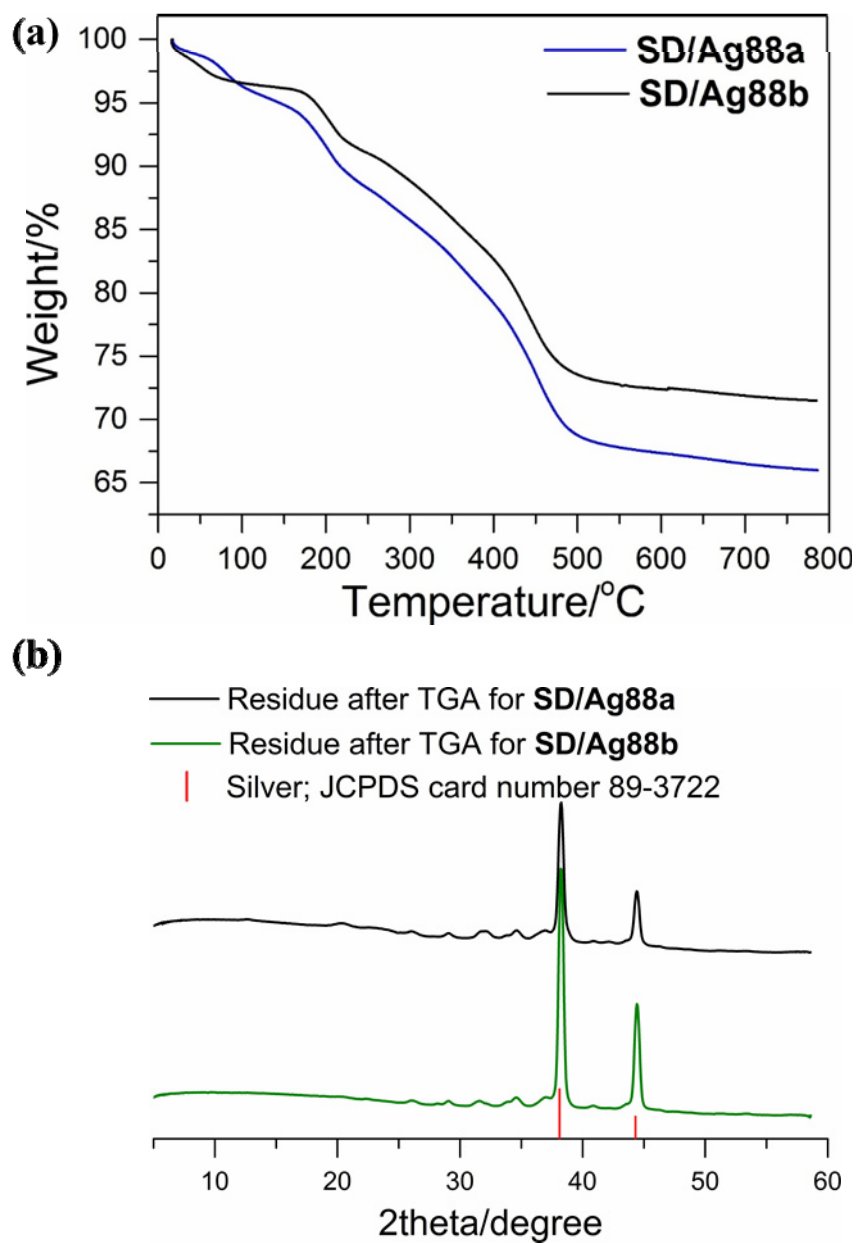

**Supplementary Figure 7:** (a) The TGA curves of **SD/Ag88a** and **SD/Ag88b**. (b) The PXRD patterns of residues after TG analysis for **SD/Ag88a** and **SD/Ag88b**.

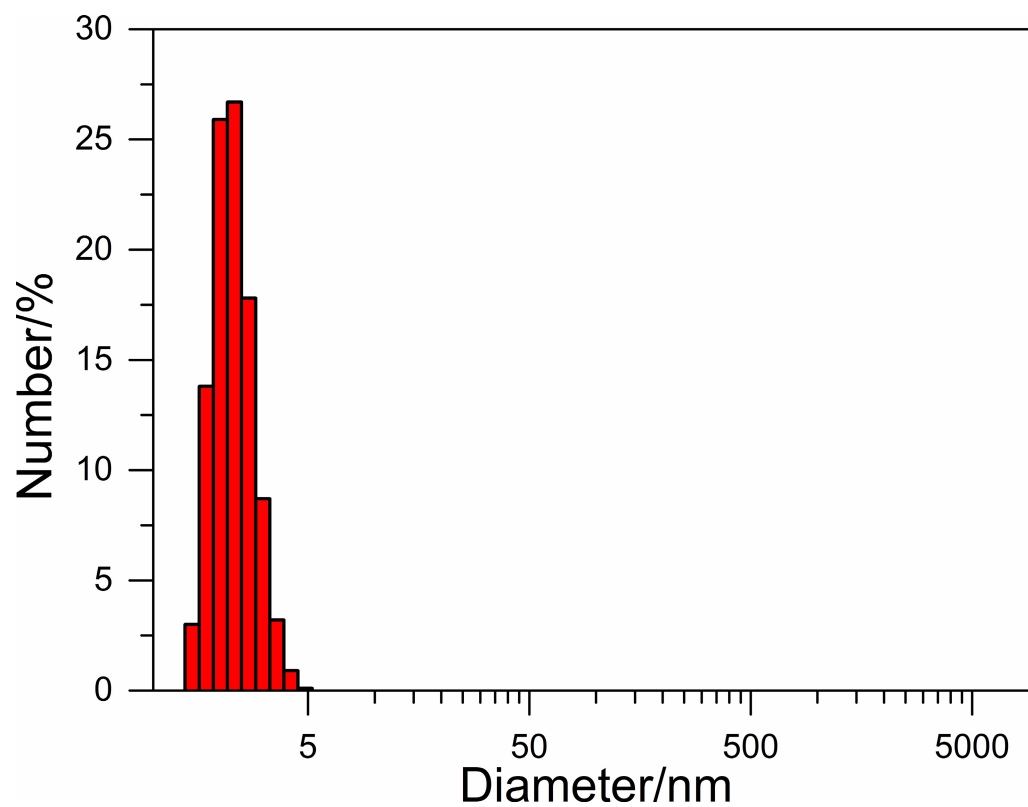

**Supplementary Figure 8:** Size distribution of species in a  $\text{CH}_2\text{Cl}_2$  dilute solution of **SD/Ag88a** determined by dynamic light scattering (DLS).

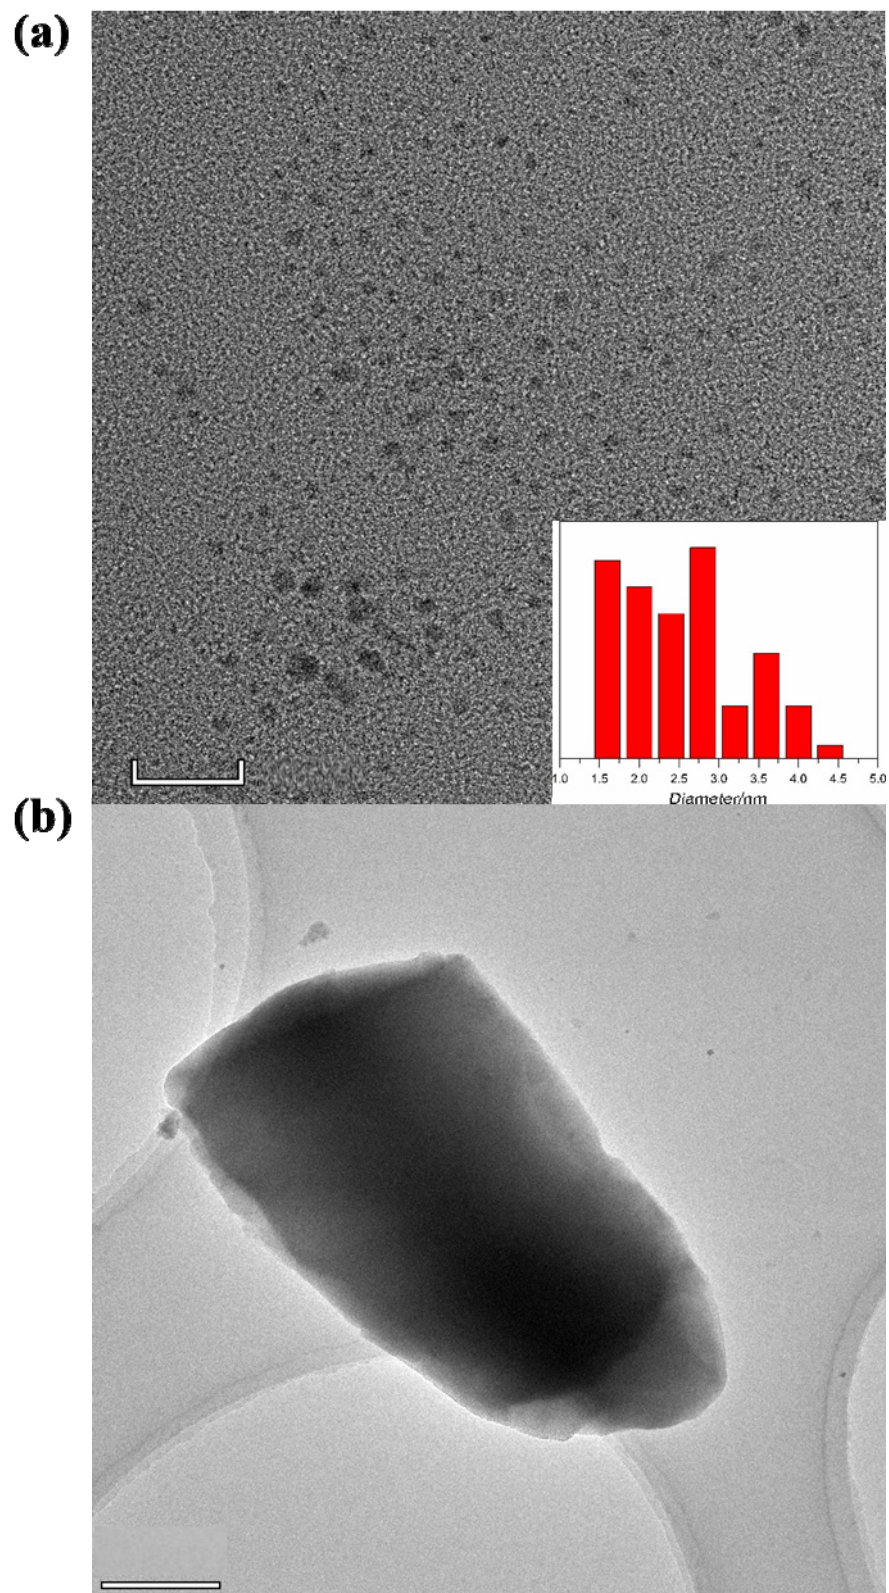

**Supplementary Figure 9:** TEM images of **SD/Ag88a** dissolved in  $\text{CH}_2\text{Cl}_2$  (a) and dispersed in ethanol (b). The scale bars are 20 nm (a) and 500 nm (b).

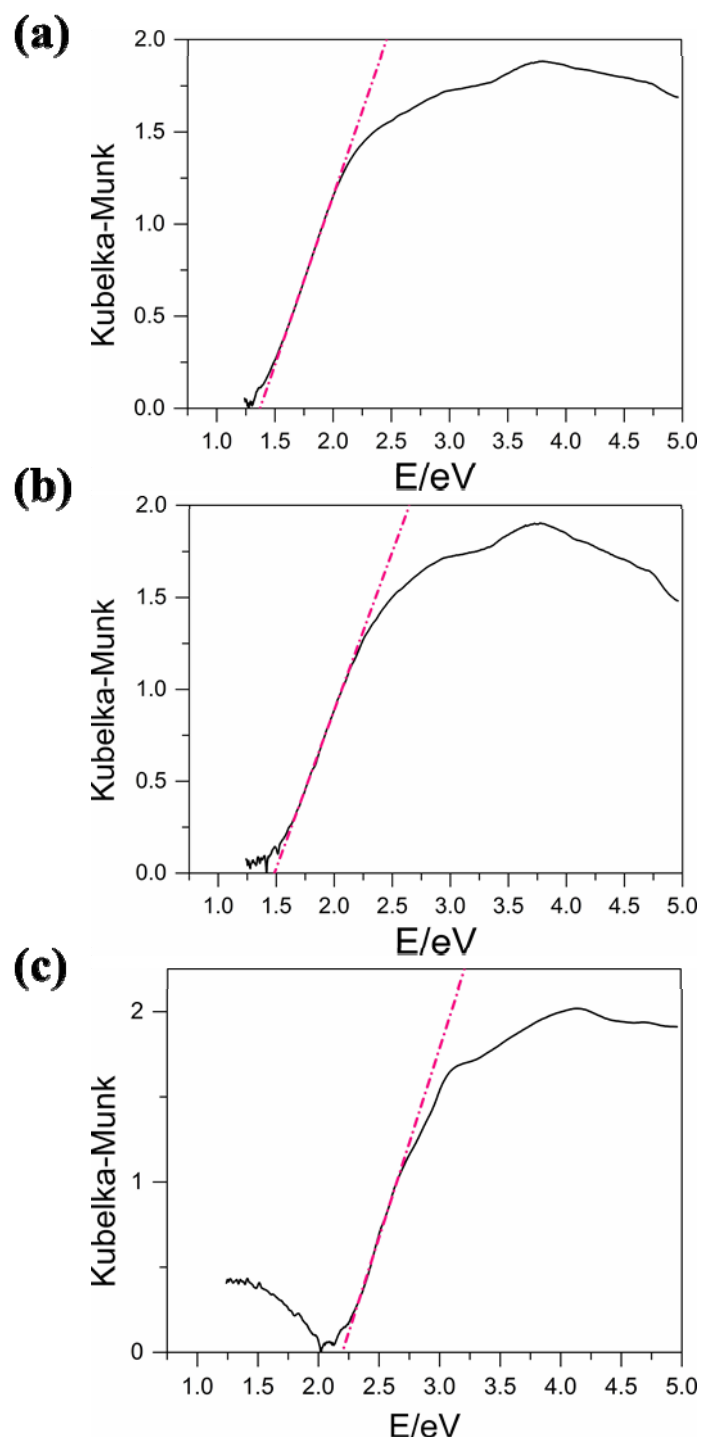

**Supplementary Figure 10:** Absorption spectra of **SD/Ag88a**, **SD/Ag88b** and  $(EtSAg)_n$  precursor derived from the diffuse reflectance spectra through Kubelka-Munk function.

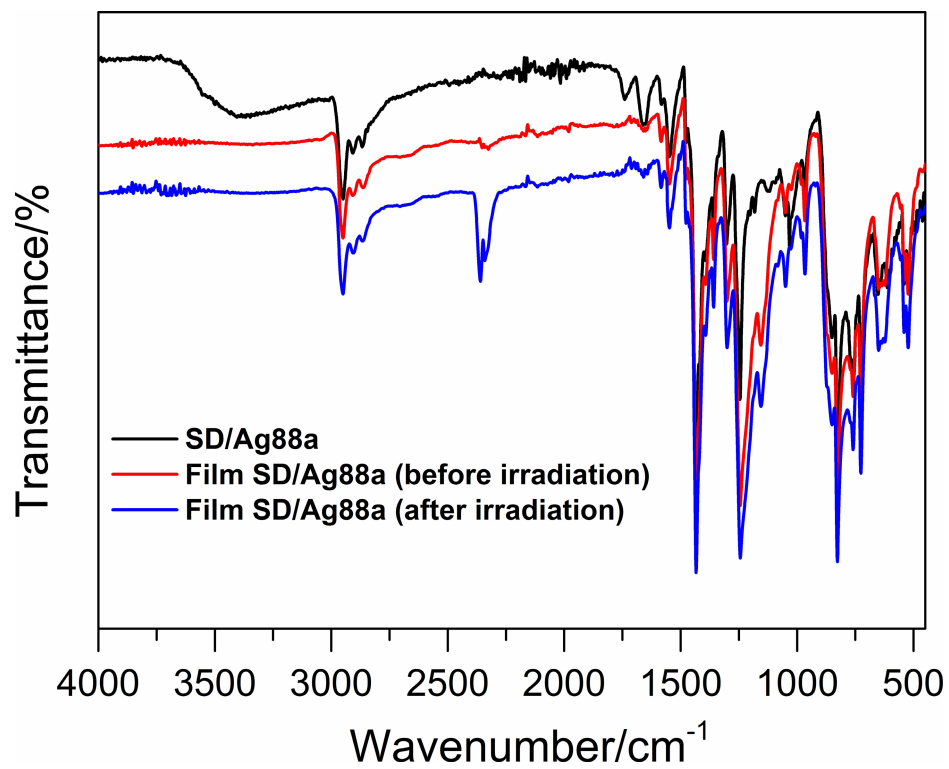

**Supplementary Figure 11:** The compared IR spectra of SD/Ag88a.



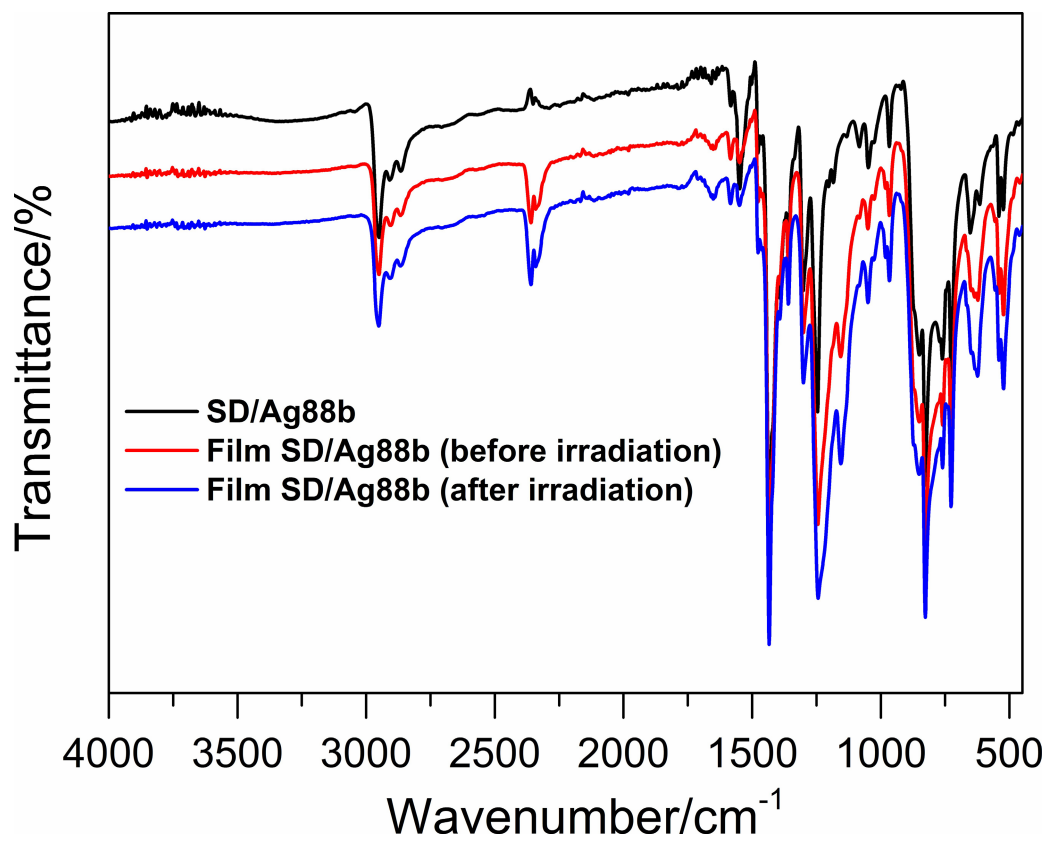

**Supplementary Figure 12:** The compared IR spectra of **SD/Ag88b**.

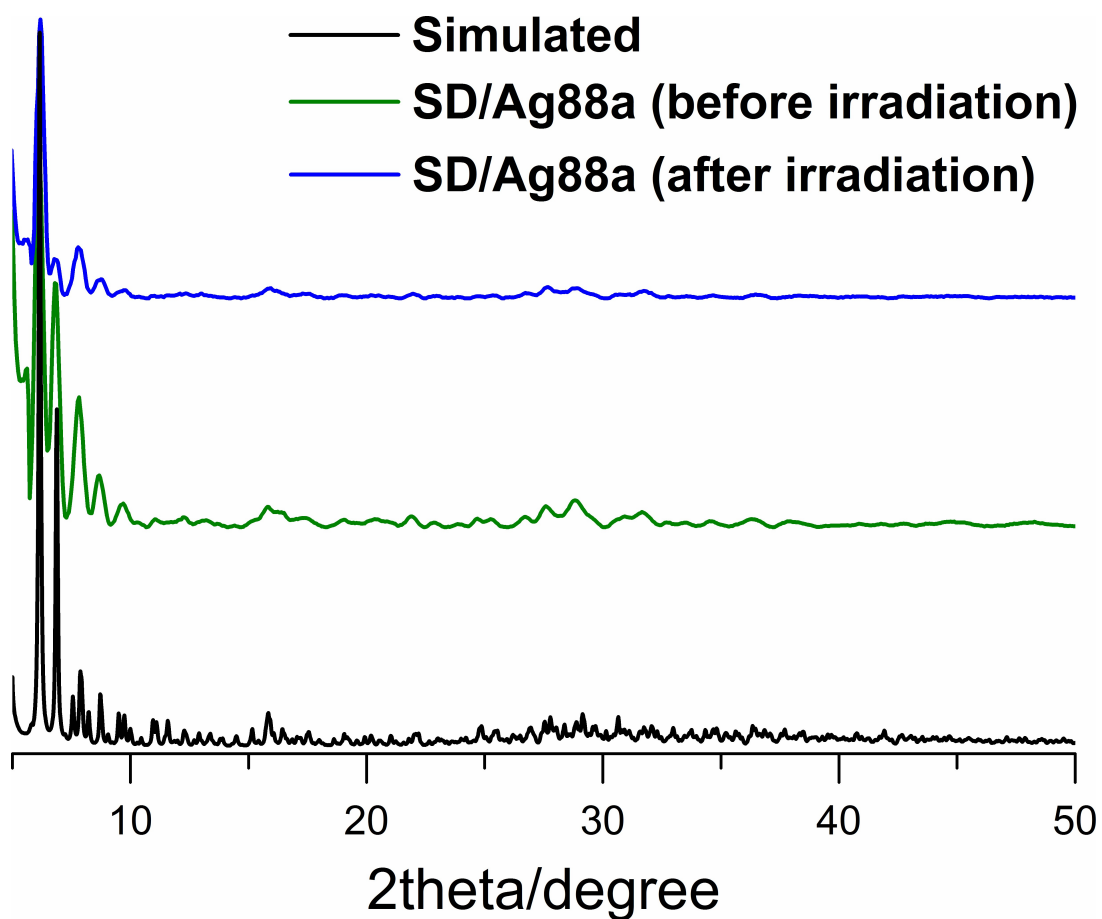

**Supplementary Figure 13:** The compared PXRD patterns of **SD/Ag88a** (The simulated PXRD pattern from SCXRD, experimental PXRD patterns of as-synthesized product, experimental PXRD patterns of the sample of **SD/Ag88a** after 420 nm light irradiation).

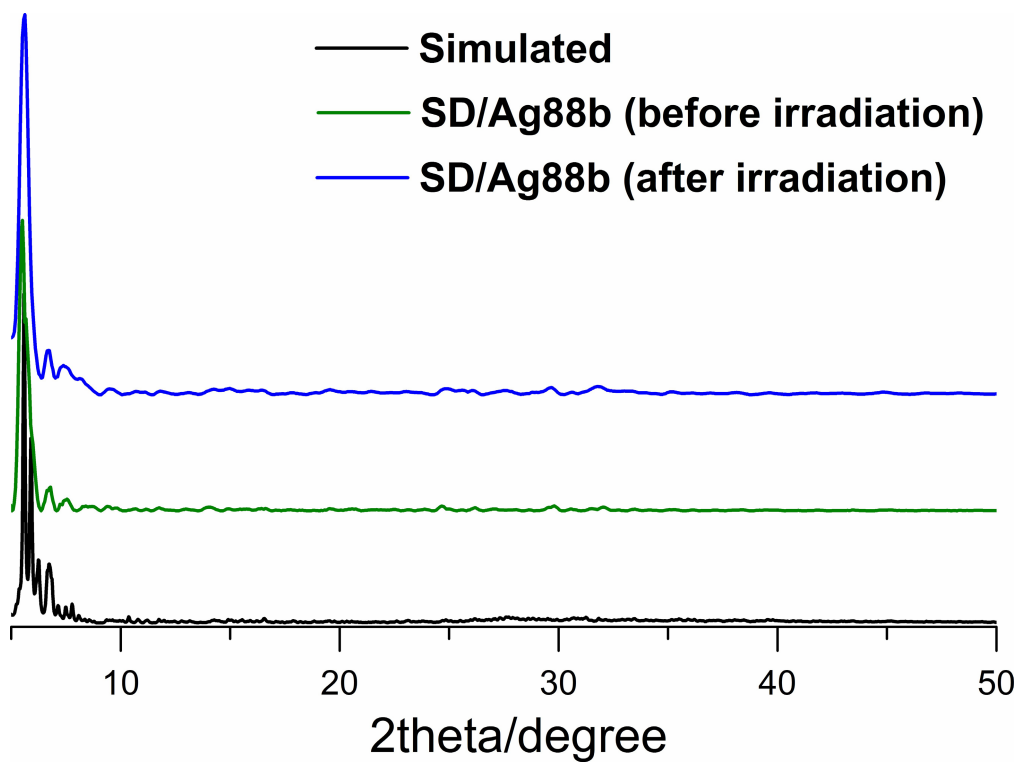

**Supplementary Figure 14:** The compared PXRD patterns of **SD/Ag88b** (The simulated PXRD pattern from SCXRD, experimental PXRD patterns of as-synthesized product, experimental PXRD patterns of the sample of **SD/Ag88b** after 420 nm light irradiation).

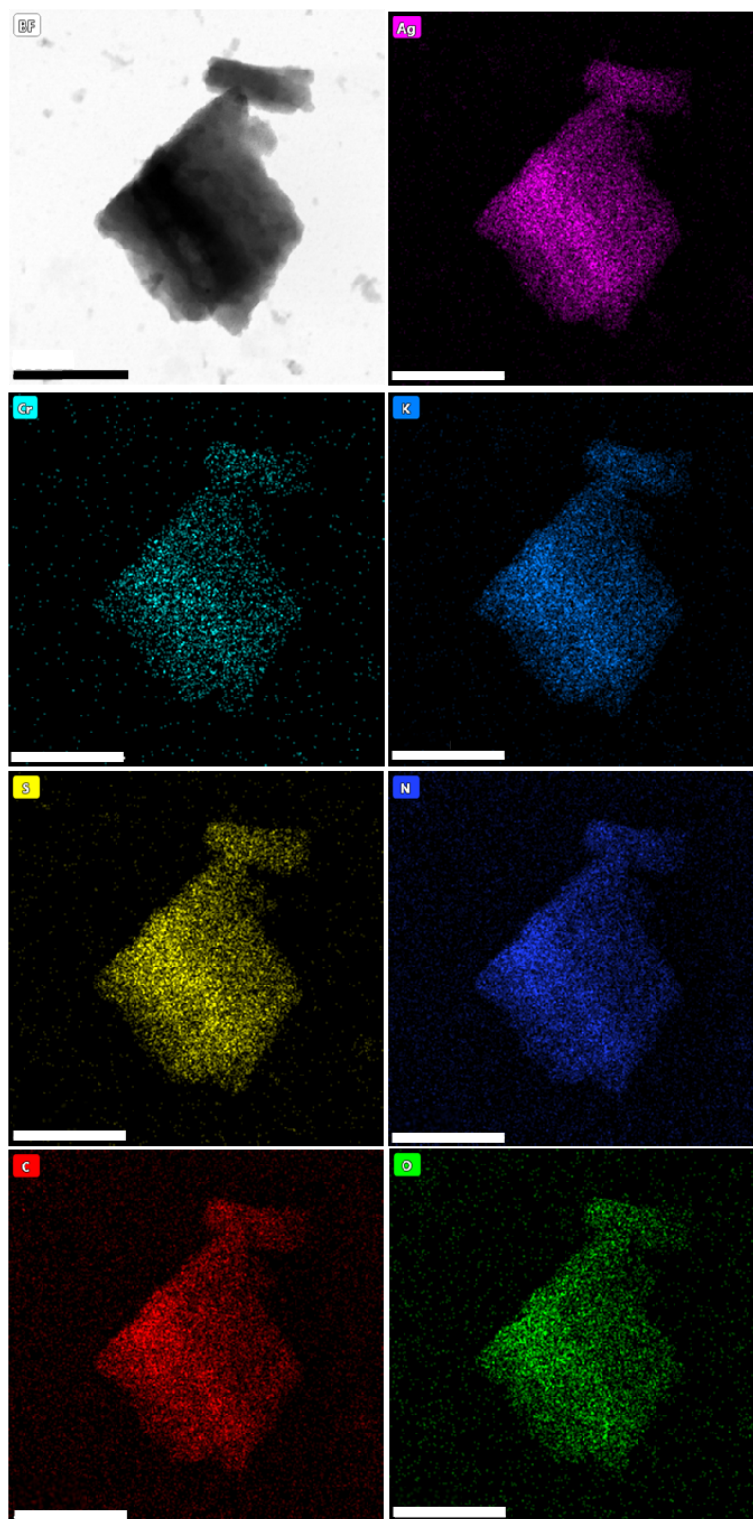

**Supplementary Figure 15:** SEM and elemental mapping images of SD/Ag88a. The scale bar is 500 nm.

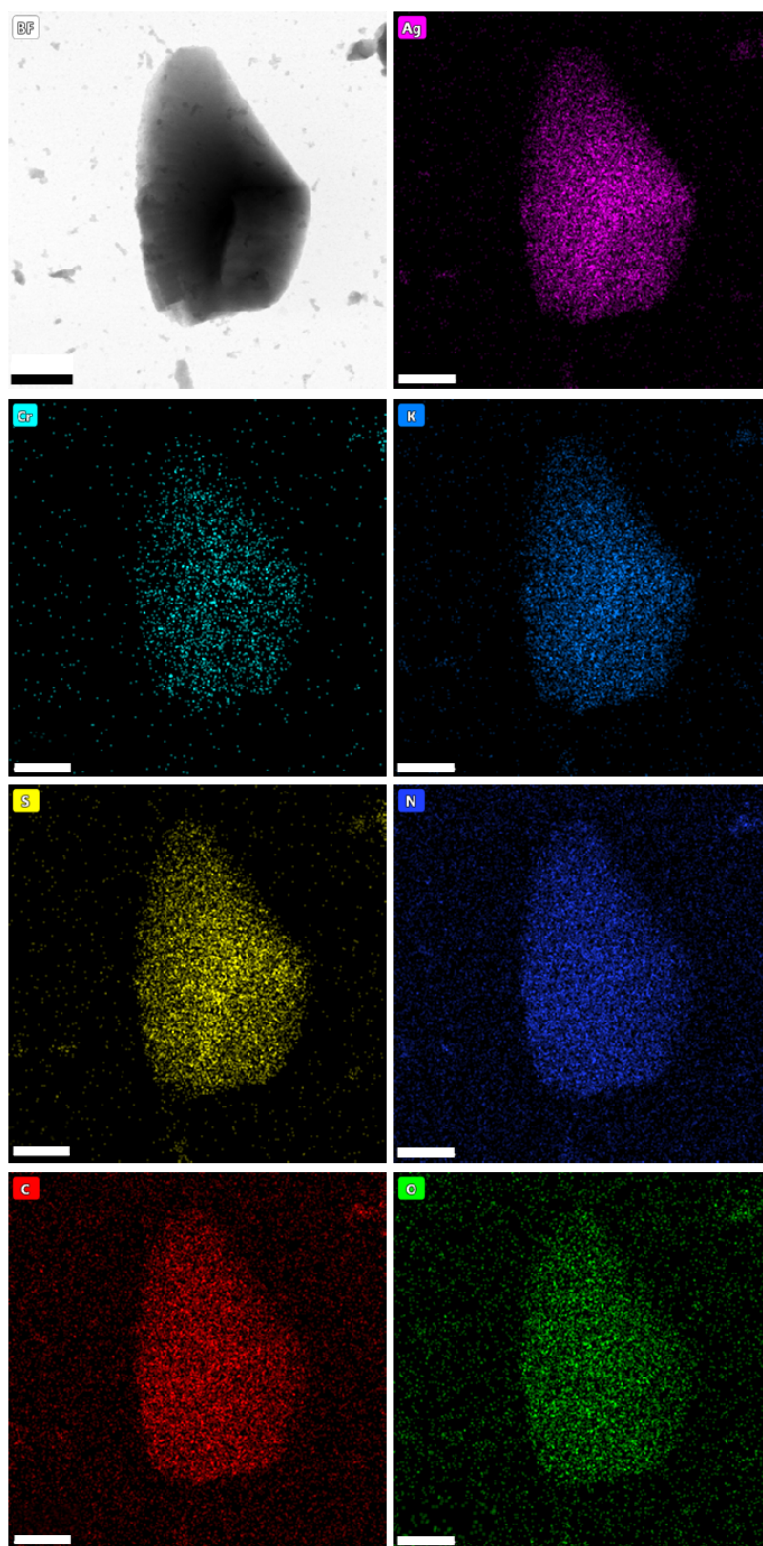

**Supplementary Figure 16:** SEM and elemental mapping images of SD/Ag88b. The scale bar is 500 nm.

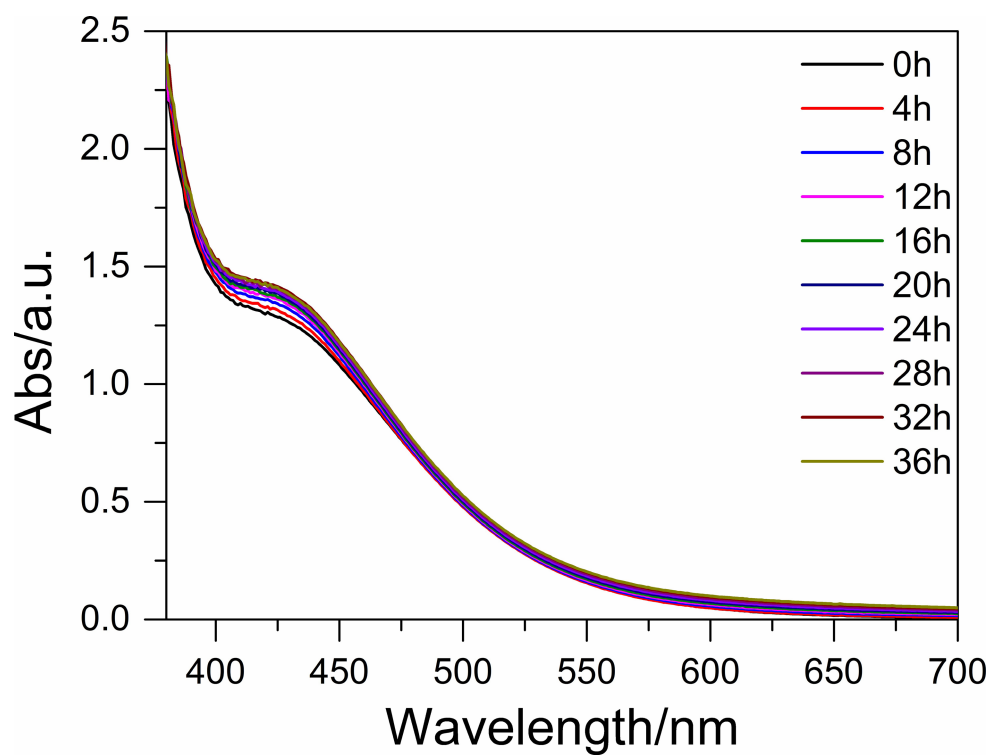

**Supplementary Figure 17:** Time-course UV-Vis spectra of SD/Ag88a in CH<sub>2</sub>Cl<sub>2</sub>.

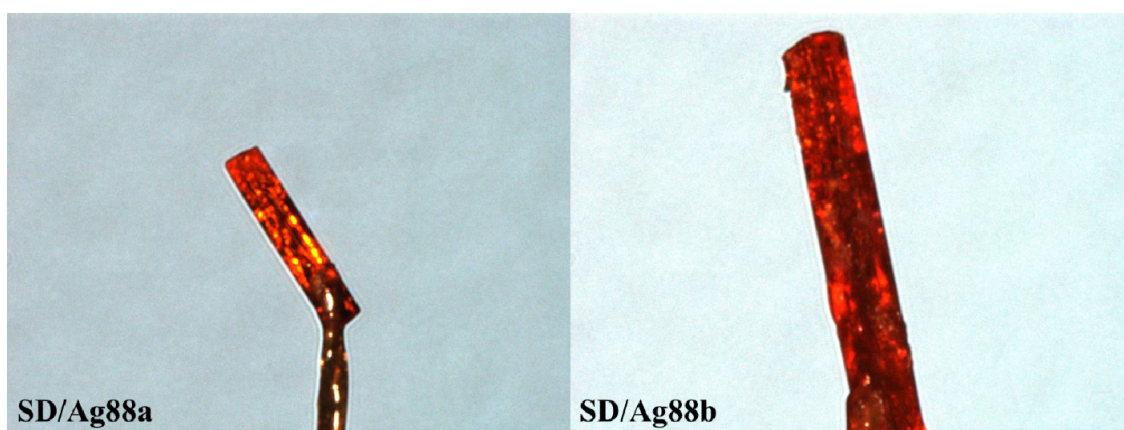

**Supplementary Figure 18:** Single-crystal photographs of **SD/Ag88a** and **SD/Ag88b**.

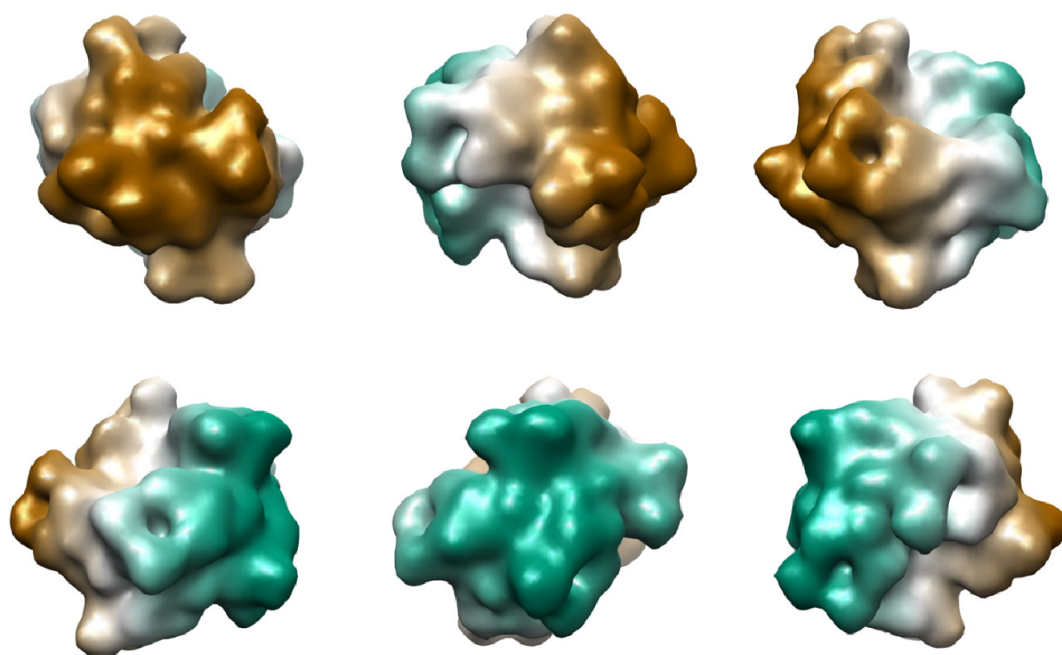

**Supplementary Figure 19:** The surface of **SD/Ag88b** calculated via 3V Volume Assessor program<sup>8</sup> by rolling a virtual probe (0.8 Å) on the surface viewed along six different orientations.



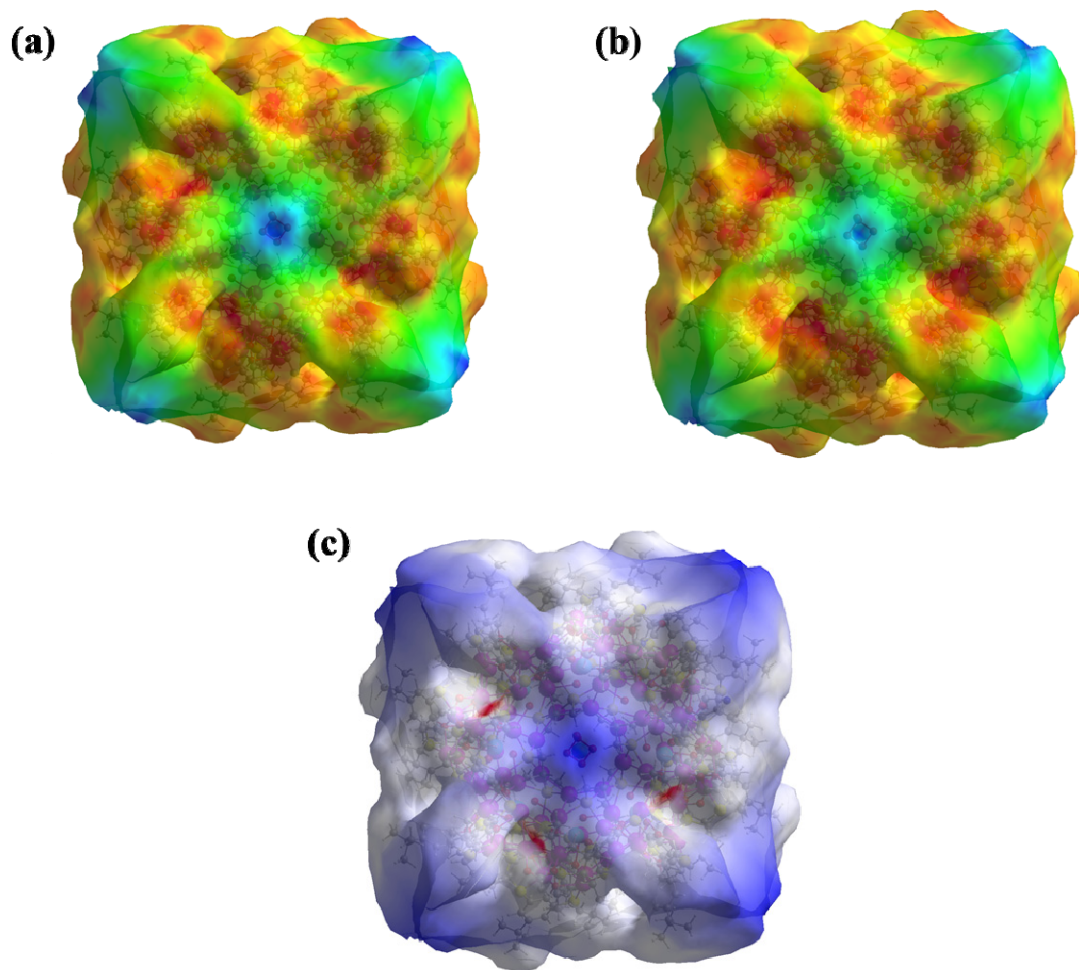

**Supplementary Figure 20:** Hirshfeld surface<sup>9</sup> of **SD/Ag88a** with  $d_i$  **(a)**,  $d_e$  **(b)**  $d_{\text{norm}}$  **(c)** mapped in colour. In all cases red represents the closest contacts, and blue the most distant contacts.

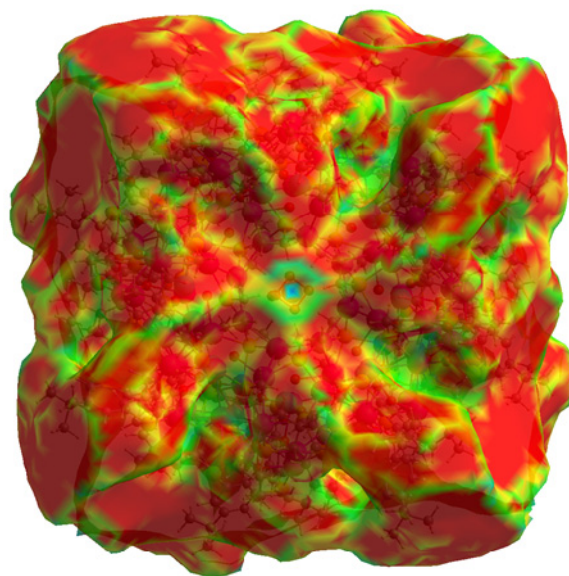

**-1.2**  **0.4**  
**curvedness**

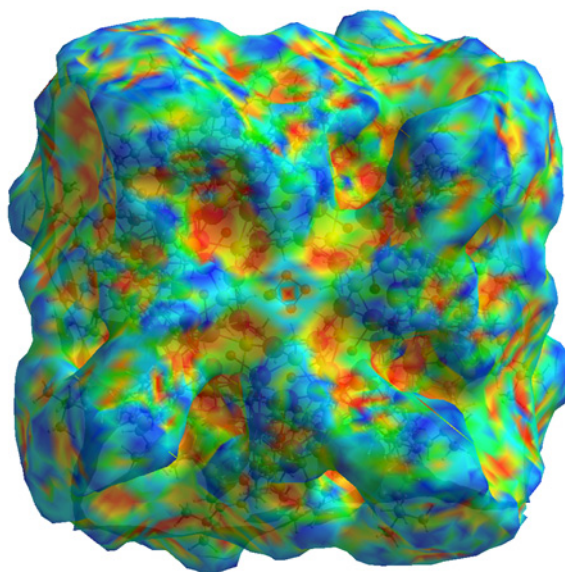

**-1.0**  **1**  
**concave** **shape index** **convex**

Supplementary Figure 21: Hirshfeld surface<sup>9</sup> of SD/Ag88a with curvedness and shape index mapping.

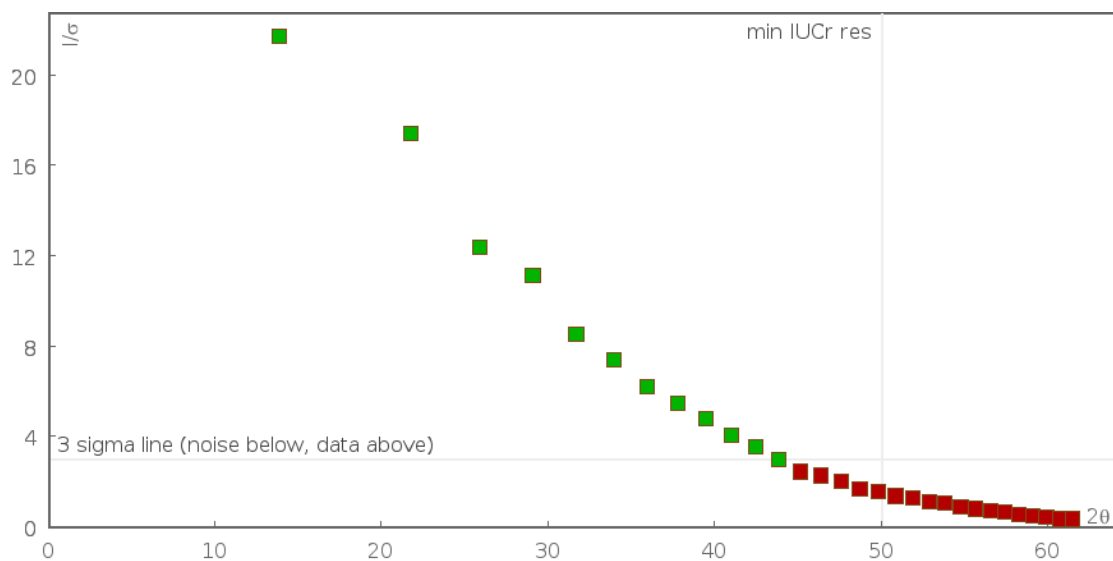

**Supplementary Figure 22:** The I/sigma vs. resolution plot of **SD/Ag88a** derived from reflection data statistics using OLEX 1.2.10.<sup>6</sup>

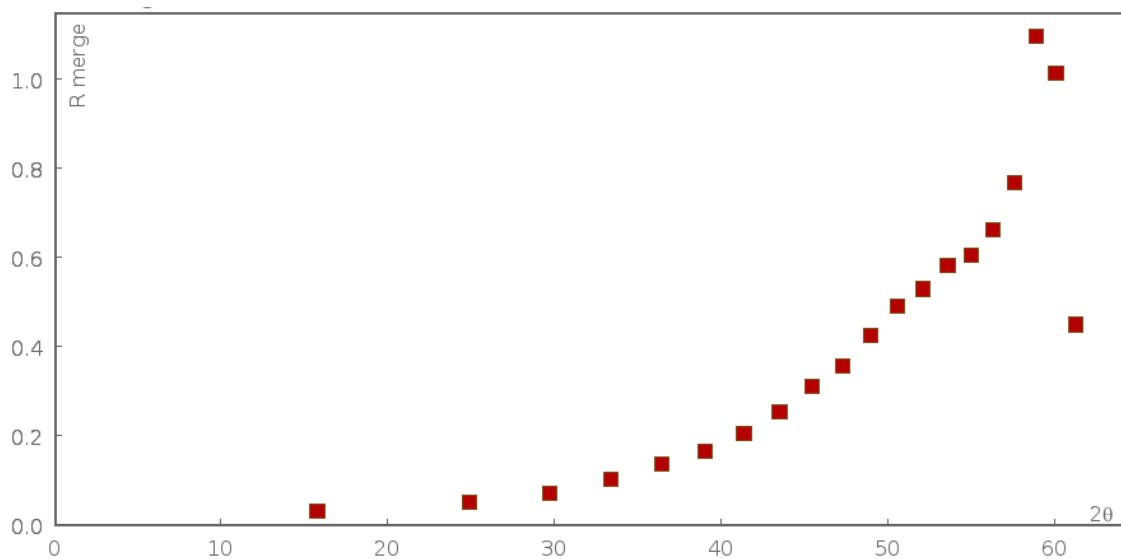

**Supplementary Figure 23:** The  $R_{\text{merge}}$  vs. resolution plot of **SD/Ag88a** derived from reflection data statistics using OLEX 1.2.10.<sup>6</sup>

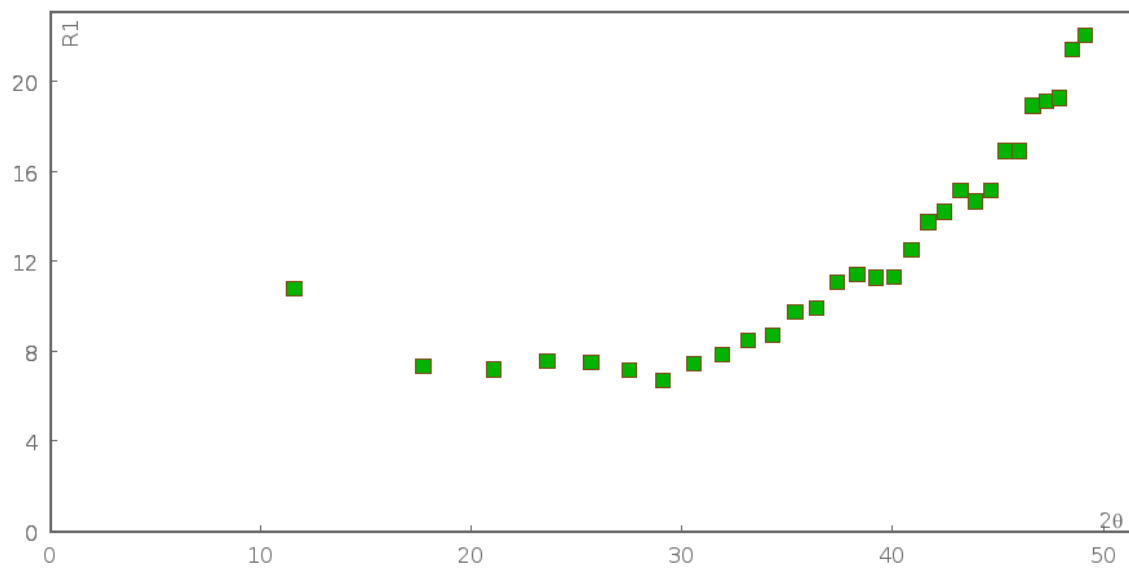

**Supplementary Figure 24:** The  $R_1$  factor vs. resolution plot of **SD/Ag88a** derived from reflection data statistics using OLEX 1.2.10.<sup>6</sup>

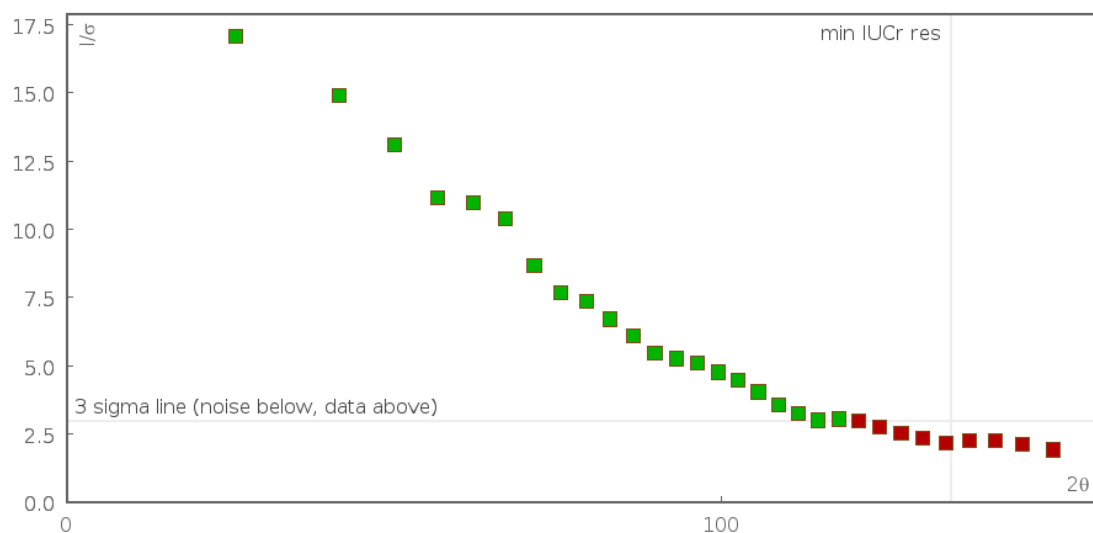

**Supplementary Figure 25:** The I/sigma vs. resolution plot of **SD/Ag88b** derived from reflection data statistics using OLEX 1.2.10.<sup>6</sup>

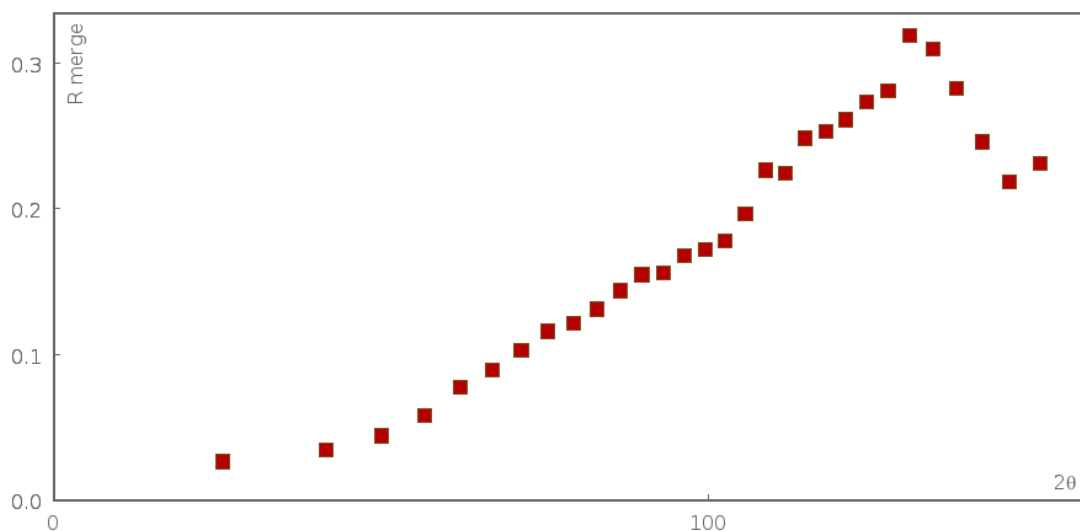

**Supplementary Figure 26:** The  $R_{\text{merge}}$  vs. resolution plot of **SD/Ag88b** derived from reflection data statistics using OLEX 1.2.10.<sup>6</sup>

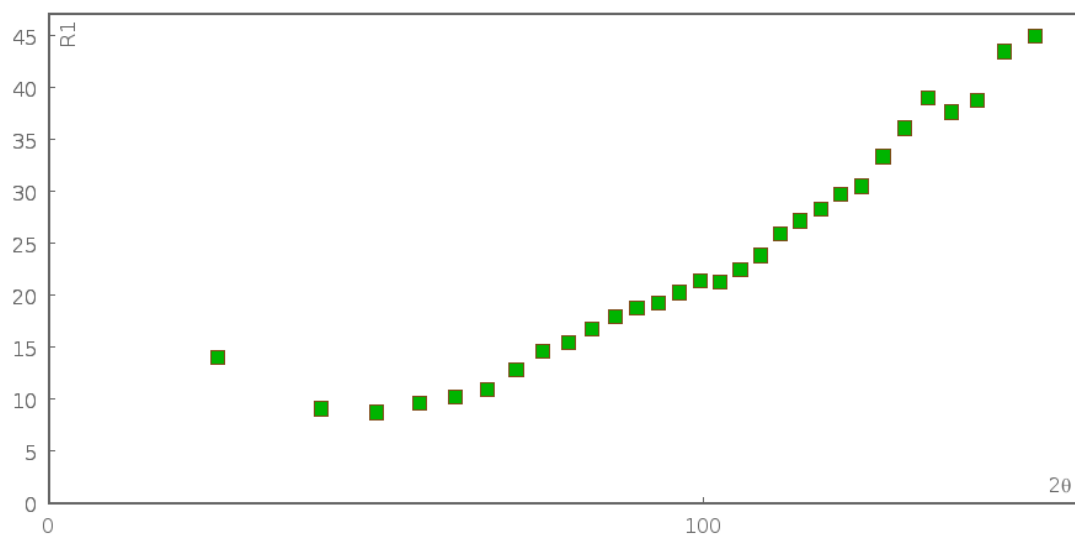

**Supplementary Figure 27:** The  $R_1$  factor vs. resolution plot of **SD/Ag88b** derived from reflection data statistics using OLEX 1.2.10.<sup>6</sup>



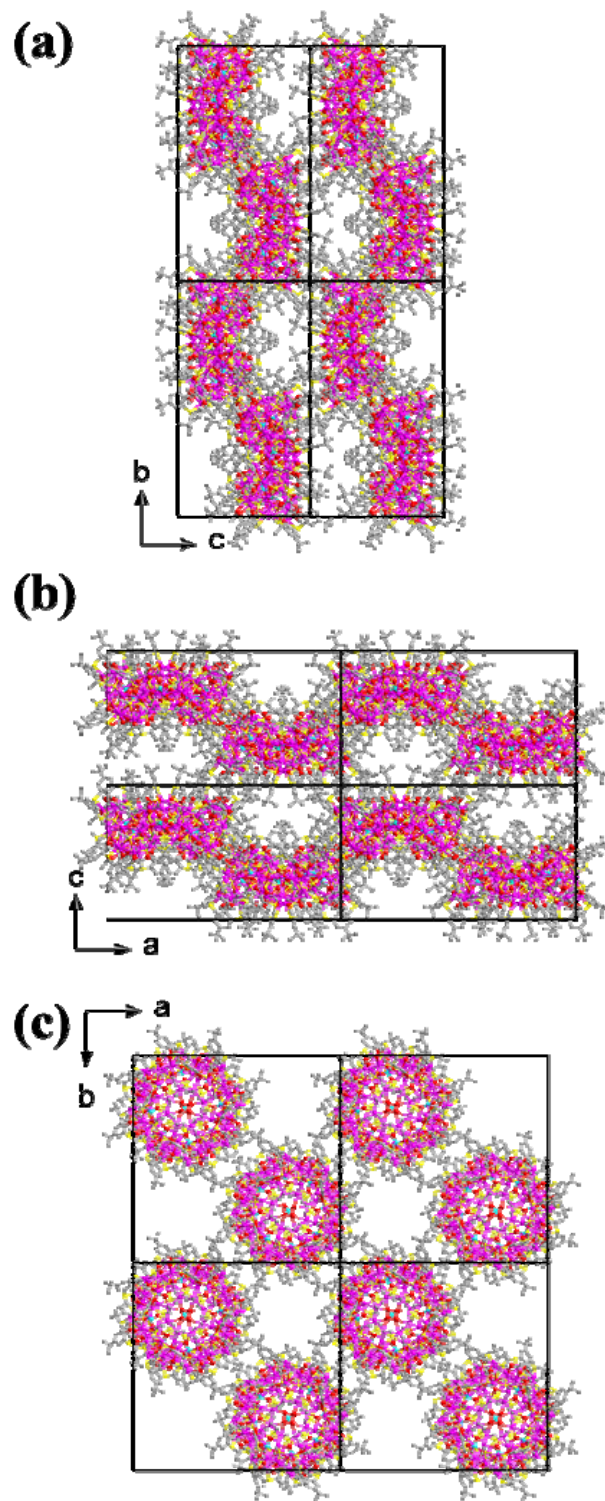

**Supplementary Figure 28:** Molecules packing diagrams in  $2 \times 2 \times 2$  unit cells of **SD/Ag88a** viewed from different directions.

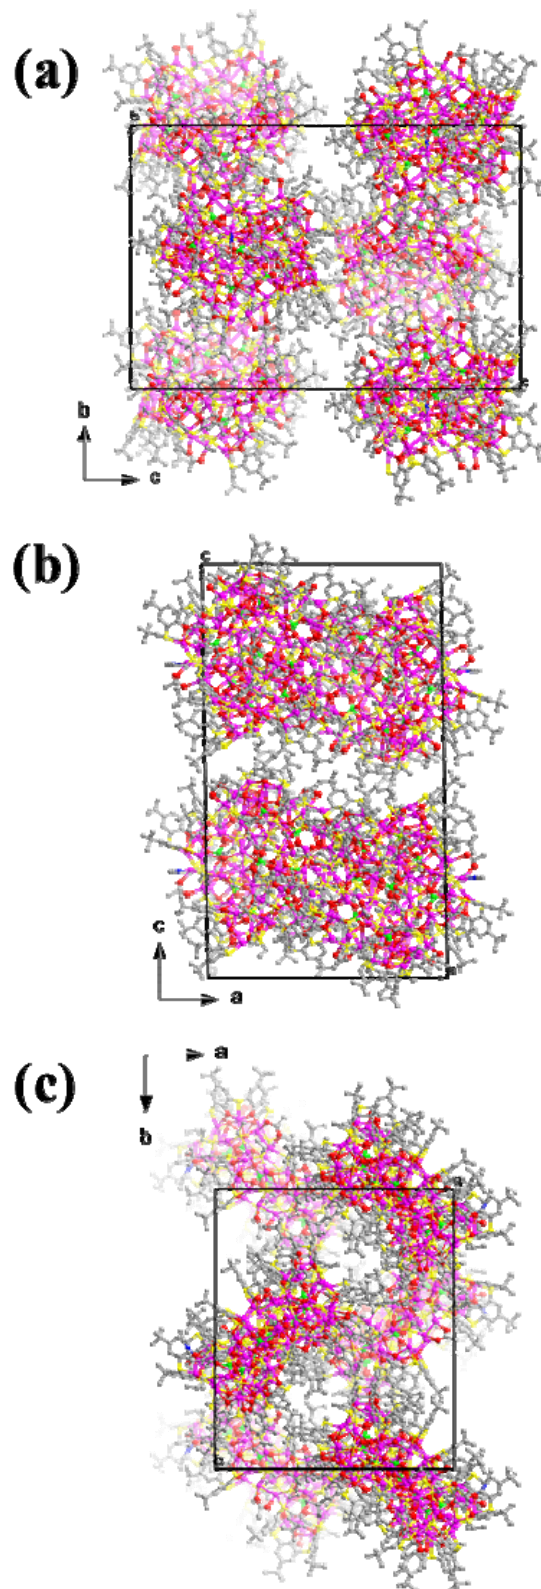

**Supplementary Figure 29:** Molecules packing diagrams in one unit cell of **SD/Ag88b** viewed from different directions.

**Supplementary Table 1:** Crystal data collection and structure refinement for **SD/Ag88a** and **SD/Ag88b**.

| Compound                                    | <b>SD/Ag88a</b>                                                                                                    | <b>SD/Ag88b</b>                                                                                                   |
|---------------------------------------------|--------------------------------------------------------------------------------------------------------------------|-------------------------------------------------------------------------------------------------------------------|
| Empirical formula                           | C <sub>428</sub> H <sub>588</sub> Ag <sub>88</sub> Cr <sub>9</sub> N <sub>12</sub> O <sub>88</sub> S <sub>64</sub> | C <sub>418</sub> H <sub>563</sub> Ag <sub>88</sub> Cr <sub>9</sub> N <sub>9</sub> O <sub>84</sub> S <sub>64</sub> |
| Formula weight                              | 19321.47                                                                                                           | 19070.14                                                                                                          |
| Temperature/K                               | 100.00(11)                                                                                                         | 99.99(10)                                                                                                         |
| Crystal system                              | tetragonal                                                                                                         | monoclinic                                                                                                        |
| Space group                                 | <i>P4/n</i>                                                                                                        | <i>P2<sub>1</sub>/c</i>                                                                                           |
| a/Å                                         | 40.6030(4)                                                                                                         | 32.5061(4)                                                                                                        |
| b/Å                                         | 40.6030(4)                                                                                                         | 38.2317(7)                                                                                                        |
| c/Å                                         | 23.1435(3)                                                                                                         | 56.4459(6)                                                                                                        |
| α/°                                         | 90                                                                                                                 | 90                                                                                                                |
| β/°                                         | 90                                                                                                                 | 90.9112(12)                                                                                                       |
| γ/°                                         | 90                                                                                                                 | 90                                                                                                                |
| Volume/Å <sup>3</sup>                       | 38154.6(9)                                                                                                         | 70140.2(17)                                                                                                       |
| Z                                           | 2                                                                                                                  | 4                                                                                                                 |
| ρ <sub>calc</sub> /cm <sup>3</sup>          | 1.682                                                                                                              | 1.806                                                                                                             |
| μ/mm <sup>-1</sup>                          | 2.540                                                                                                              | 22.449                                                                                                            |
| F(000)                                      | 18640.0                                                                                                            | 36728.0                                                                                                           |
| Radiation                                   | MoKα (λ = 0.71073)                                                                                                 | CuKα (λ = 1.54184)                                                                                                |
| 2θ range for data collection/°              | 5.016 to 49.42                                                                                                     | 5.438 to 134.156                                                                                                  |
| Index ranges                                | -47 ≤ h ≤ 47, -47 ≤ k ≤ 45, -27 ≤ l ≤ 26                                                                           | -38 ≤ h ≤ 38, -45 ≤ k ≤ 18, -67 ≤ l ≤ 67                                                                          |
| Reflections collected                       | 261763                                                                                                             | 390897                                                                                                            |
| Independent reflections                     | 32406 [R <sub>int</sub> = 0.0941, R <sub>sigma</sub> = 0.0433]                                                     | 122491 [R <sub>int</sub> = 0.0981, R <sub>sigma</sub> = 0.0767]                                                   |
| Data/parameters                             | 32406/1479                                                                                                         | 122491/5970                                                                                                       |
| Goodness-of-fit on F <sup>2</sup>           | 1.130                                                                                                              | 1.057                                                                                                             |
| Final R indexes [I ≥ 2σ (I)]                | R <sub>1</sub> = 0.0928, wR <sub>2</sub> = 0.2260                                                                  | R <sub>1</sub> = 0.1141, wR <sub>2</sub> = 0.2774                                                                 |
| Final R indexes [all data]                  | R <sub>1</sub> = 0.1067, wR <sub>2</sub> = 0.2371                                                                  | R <sub>1</sub> = 0.1403, wR <sub>2</sub> = 0.2969                                                                 |
| Largest diff. peak/hole / e Å <sup>-3</sup> | 2.67/-2.47                                                                                                         | 2.72/-2.88                                                                                                        |

**Supplementary Table 2:** Selected bond distances (Å) and angles (°) for **SD/Ag88a** and **SD/Ag88b**.

| <b>SD/Ag88a</b>       |            |                        |            |
|-----------------------|------------|------------------------|------------|
| Ag1—Ag2               | 3.272 (3)  | Ag11—Ag12              | 2.836 (2)  |
| Ag1—Ag8               | 2.920 (3)  | Ag11—S4                | 2.547 (5)  |
| Ag1—Ag21 <sup>i</sup> | 3.229 (2)  | Ag11—S13               | 2.401 (5)  |
| Ag1—S3 <sup>i</sup>   | 2.753 (5)  | Ag11—O17               | 2.386 (12) |
| Ag1—S9 <sup>i</sup>   | 2.492 (5)  | Ag11—O18               | 2.352 (12) |
| Ag1—S15               | 2.562 (5)  | Ag12—Ag13              | 3.172 (3)  |
| Ag1—O11               | 2.411 (19) | Ag12—Ag14              | 3.224 (3)  |
| Ag2—Ag3               | 2.883 (3)  | Ag12—Ag15              | 3.231 (3)  |
| Ag2—Ag21 <sup>i</sup> | 3.284 (2)  | Ag12—S10               | 2.482 (6)  |
| Ag2—S15               | 2.460 (5)  | Ag12—O5                | 2.529 (15) |
| Ag2—S16 <sup>i</sup>  | 2.546 (5)  | Ag12—O10               | 2.254 (13) |
| Ag2—O6 <sup>i</sup>   | 2.412 (14) | Ag13—Ag14              | 2.841 (3)  |
| Ag2—O7                | 2.477 (15) | Ag13—S8 <sup>i</sup>   | 2.633 (4)  |
| Ag3—Ag4               | 2.825 (2)  | Ag13—S11               | 2.624 (6)  |
| Ag3—Ag4 <sup>i</sup>  | 2.827 (2)  | Ag13—S13               | 2.526 (6)  |
| Ag3—S12               | 2.434 (5)  | Ag13—O13               | 2.39 (2)   |
| Ag3—S16 <sup>i</sup>  | 2.476 (5)  | Ag14—Ag16              | 3.049 (3)  |
| Ag3—O2                | 2.55 (3)   | Ag14—Ag17              | 3.185 (3)  |
| Ag4—Ag3 <sup>ii</sup> | 2.827 (2)  | Ag14—S10               | 2.507 (7)  |
| Ag4—Ag5               | 2.901 (3)  | Ag14—S11               | 2.472 (6)  |
| Ag4—S12               | 2.487 (6)  | Ag14—O14               | 2.22 (2)   |
| Ag4—S16               | 2.459 (5)  | Ag15—Ag16              | 3.323 (3)  |
| Ag4—O7                | 2.540 (15) | Ag15—S9                | 2.402 (5)  |
| Ag5—Ag12              | 3.310 (3)  | Ag15—S10               | 2.402 (6)  |
| Ag5—Ag13              | 3.236 (3)  | Ag15—O5                | 2.571 (14) |
| Ag5—S11               | 2.457 (6)  | Ag16—Ag19              | 3.225 (2)  |
| Ag5—S12               | 2.538 (5)  | Ag16—S6                | 2.511 (5)  |
| Ag5—O3                | 2.455 (14) | Ag16—S10               | 2.397 (5)  |
| Ag5—O10               | 2.467 (14) | Ag16—O20               | 2.443 (15) |
| Ag6—Ag10              | 3.332 (2)  | Ag16—O21               | 2.370 (13) |
| Ag6—S3                | 2.613 (5)  | Ag17—Ag19              | 3.135 (2)  |
| Ag6—S16               | 2.571 (6)  | Ag17—S7                | 2.597 (6)  |
| Ag6—O5                | 2.471 (14) | Ag17—S11               | 2.452 (5)  |
| Ag6—O10               | 2.492 (15) | Ag17—O19               | 2.450 (12) |
| Ag6—O15               | 2.417 (12) | Ag17—O20               | 2.474 (16) |
| Ag7—Ag8               | 3.086 (3)  | Ag18—S8                | 2.590 (4)  |
| Ag7—Ag10              | 3.133 (2)  | Ag18—S12 <sup>ii</sup> | 2.568 (6)  |
| Ag7—S1                | 2.613 (5)  | Ag18—O6                | 2.453 (14) |
| Ag7—S15               | 2.466 (5)  | Ag18—O8 <sup>ii</sup>  | 2.536 (14) |

|                                       |             |                          |             |
|---------------------------------------|-------------|--------------------------|-------------|
| Ag7—O15                               | 2.362 (12)  | Ag18—O19                 | 2.485 (11)  |
| Ag7—O16                               | 2.488 (14)  | Ag19—Ag20                | 3.104 (2)   |
| Ag8—Ag9                               | 3.028 (2)   | Ag19—O4                  | 2.392 (12)  |
| Ag8—S14                               | 2.641 (7)   | Ag19—O19                 | 2.255 (5)   |
| Ag8—S15                               | 2.517 (6)   | Ag19—O20                 | 2.370 (10)  |
| Ag8—O12                               | 2.14 (2)    | Ag19—O21                 | 2.382 (9)   |
| Ag9—Ag10                              | 3.202 (2)   | Ag19—O22                 | 2.377 (14)  |
| Ag9—Ag22                              | 3.141 (2)   | Ag20—Ag21                | 2.871 (2)   |
| Ag9—S2                                | 2.540 (4)   | Ag20—S5                  | 2.521 (4)   |
| Ag9—S14                               | 2.425 (5)   | Ag20—S9                  | 2.384 (5)   |
| Ag9—O16                               | 2.419 (13)  | Ag20—O21                 | 2.393 (12)  |
| Ag9—O17                               | 2.333 (14)  | Ag20—O22                 | 2.377 (10)  |
| Ag10—Ag11                             | 3.080 (2)   | Ag21—Ag22 <sup>ii</sup>  | 3.280 (2)   |
| Ag10—O9                               | 2.351 (14)  | Ag21—S14 <sup>ii</sup>   | 2.489 (6)   |
| Ag10—O15                              | 2.365 (14)  | Ag21—O6                  | 2.240 (14)  |
| Ag10—O16                              | 2.401 (15)  | Ag21—O8 <sup>ii</sup>    | 2.521 (14)  |
| Ag10—O17                              | 2.389 (14)  | Ag22—S13                 | 2.408 (6)   |
| Ag10—O18                              | 2.306 (13)  | Ag22—S14                 | 2.423 (6)   |
| S9 <sup>i</sup> —Ag1—S3 <sup>i</sup>  | 90.86 (15)  | O17—Ag11—S13             | 118.4 (4)   |
| S9 <sup>i</sup> —Ag1—S15              | 147.48 (17) | O18—Ag11—S4              | 77.6 (3)    |
| S15—Ag1—S3 <sup>i</sup>               | 102.09 (15) | O18—Ag11—S13             | 133.1 (3)   |
| O11—Ag1—S3 <sup>i</sup>               | 94.3 (5)    | O18—Ag11—O17             | 89.0 (4)    |
| O11—Ag1—S9 <sup>i</sup>               | 104.0 (5)   | S10—Ag12—O5              | 93.8 (3)    |
| O11—Ag1—S15                           | 104.6 (5)   | O10—Ag12—S10             | 170.6 (4)   |
| S15—Ag2—S16 <sup>i</sup>              | 123.66 (17) | O10—Ag12—O5              | 78.3 (5)    |
| S15—Ag2—O7                            | 90.0 (4)    | S11—Ag13—S8 <sup>i</sup> | 106.91 (16) |
| O6 <sup>i</sup> —Ag2—S15              | 124.0 (4)   | S13—Ag13—S8 <sup>i</sup> | 97.61 (15)  |
| O6 <sup>i</sup> —Ag2—S16 <sup>i</sup> | 105.1 (4)   | S13—Ag13—S11             | 143.98 (19) |
| O6 <sup>i</sup> —Ag2—O7               | 93.8 (5)    | O13—Ag13—S8 <sup>i</sup> | 96.9 (5)    |
| O7—Ag2—S16 <sup>i</sup>               | 114.4 (4)   | O13—Ag13—S11             | 101.0 (7)   |
| S12—Ag3—S16 <sup>i</sup>              | 164.7 (2)   | O13—Ag13—S13             | 101.8 (7)   |
| S12—Ag3—O2                            | 79.5 (7)    | S11—Ag14—S10             | 126.2 (2)   |
| S16 <sup>i</sup> —Ag3—O2              | 114.6 (7)   | O14—Ag14—S10             | 105.7 (7)   |
| S12—Ag4—O7                            | 83.9 (4)    | O14—Ag14—S11             | 122.3 (6)   |
| S16—Ag4—S12                           | 164.8 (2)   | S9—Ag15—O5               | 89.9 (4)    |
| S16—Ag4—O7                            | 94.2 (4)    | S10—Ag15—S9              | 164.89 (19) |
| S11—Ag5—S12                           | 126.3 (2)   | S10—Ag15—O5              | 94.7 (4)    |
| S11—Ag5—O10                           | 121.7 (4)   | S10—Ag16—S6              | 148.7 (2)   |
| O3—Ag5—S11                            | 89.6 (3)    | S10—Ag16—O20             | 118.1 (3)   |
| O3—Ag5—S12                            | 116.1 (4)   | O20—Ag16—S6              | 76.9 (3)    |
| O3—Ag5—O10                            | 90.7 (5)    | O21—Ag16—S6              | 77.3 (3)    |
| O10—Ag5—S12                           | 105.3 (3)   | O21—Ag16—S10             | 128.7 (3)   |
| S16—Ag6—S3                            | 112.85 (16) | O21—Ag16—O20             | 84.1 (3)    |

|                                                            |             |                                          |             |
|------------------------------------------------------------|-------------|------------------------------------------|-------------|
| O5—Ag6—S3                                                  | 83.9 (3)    | S11—Ag17—S7                              | 126.89 (18) |
| O5—Ag6—S16                                                 | 90.1 (3)    | S11—Ag17—O20                             | 116.0 (3)   |
| O5—Ag6—O10                                                 | 75.2 (5)    | O19—Ag17—S7                              | 74.6 (3)    |
| O10—Ag6—S3                                                 | 144.0 (3)   | O19—Ag17—S11                             | 153.4 (3)   |
| O10—Ag6—S16                                                | 96.3 (3)    | O19—Ag17—O20                             | 83.1 (3)    |
| O15—Ag6—S3                                                 | 74.2 (3)    | O20—Ag17—S7                              | 73.5 (3)    |
| O15—Ag6—S16                                                | 112.3 (3)   | S12 <sup>ii</sup> —Ag18—S8               | 114.92 (15) |
| O15—Ag6—O5                                                 | 153.3 (4)   | O6—Ag18—S8                               | 138.7 (3)   |
| O15—Ag6—O10                                                | 114.7 (4)   | O6—Ag18—S12 <sup>ii</sup>                | 98.4 (3)    |
| S15—Ag7—S1                                                 | 124.68 (14) | O6—Ag18—O8 <sup>ii</sup>                 | 78.0 (4)    |
| S15—Ag7—O16                                                | 113.1 (4)   | O6—Ag18—O19                              | 113.7 (4)   |
| O15—Ag7—S1                                                 | 76.2 (3)    | O8 <sup>ii</sup> —Ag18—S8                | 78.6 (3)    |
| O15—Ag7—S15                                                | 153.1 (3)   | O8 <sup>ii</sup> —Ag18—S12 <sup>ii</sup> | 89.6 (3)    |
| O15—Ag7—O16                                                | 87.4 (5)    | O19—Ag18—S8                              | 72.0 (2)    |
| O16—Ag7—S1                                                 | 74.0 (3)    | O19—Ag18—S12 <sup>ii</sup>               | 118.35 (19) |
| S15—Ag8—S14                                                | 111.09 (19) | O19—Ag18—O8 <sup>ii</sup>                | 145.8 (4)   |
| O12—Ag8—S14                                                | 107.6 (7)   | O19—Ag19—O4                              | 90.4 (4)    |
| O12—Ag8—S15                                                | 126.4 (6)   | O19—Ag19—O20                             | 89.8 (5)    |
| S14—Ag9—S2                                                 | 147.87 (16) | O19—Ag19—O21                             | 170.2 (4)   |
| O16—Ag9—S2                                                 | 75.9 (4)    | O19—Ag19—O22                             | 94.7 (4)    |
| O16—Ag9—S14                                                | 113.5 (4)   | O20—Ag19—O4                              | 83.8 (4)    |
| O17—Ag9—S2                                                 | 77.3 (3)    | O20—Ag19—O21                             | 85.5 (5)    |
| O17—Ag9—S14                                                | 132.2 (3)   | O20—Ag19—O22                             | 169.6 (4)   |
| O17—Ag9—O16                                                | 86.0 (5)    | O21—Ag19—O4                              | 97.6 (4)    |
| O9—Ag10—O15                                                | 87.8 (5)    | O22—Ag19—O4                              | 105.5 (4)   |
| O9—Ag10—O16                                                | 83.6 (5)    | O22—Ag19—O21                             | 88.6 (4)    |
| O9—Ag10—O17                                                | 96.9 (5)    | S9—Ag20—S5                               | 140.18 (15) |
| O15—Ag10—O16                                               | 89.4 (4)    | S9—Ag20—O21                              | 122.3 (3)   |
| O15—Ag10—O17                                               | 172.4 (4)   | O21—Ag20—S5                              | 76.7 (3)    |
| O17—Ag10—O16                                               | 85.2 (4)    | O22—Ag20—S5                              | 76.9 (2)    |
| O18—Ag10—O9                                                | 104.1 (5)   | O22—Ag20—S9                              | 132.5 (3)   |
| O18—Ag10—O15                                               | 94.6 (4)    | O22—Ag20—O21                             | 88.4 (4)    |
| O18—Ag10—O16                                               | 171.4 (5)   | S14 <sup>ii</sup> —Ag21—O8 <sup>ii</sup> | 94.1 (4)    |
| O18—Ag10—O17                                               | 90.0 (4)    | O6—Ag21—S14 <sup>ii</sup>                | 166.3 (4)   |
| S13—Ag11—S4                                                | 141.40 (19) | O6—Ag21—O8 <sup>ii</sup>                 | 82.3 (5)    |
| O17—Ag11—S4                                                | 77.8 (4)    | S13—Ag22—S14                             | 169.83 (19) |
| Symmetry codes: (i) $-y+1/2, x, z$ ; (ii) $y, -x+1/2, z$ . |             |                                          |             |
| <b>SD/Ag88b</b>                                            |             |                                          |             |
| Ag1—Ag5                                                    | 3.100 (4)   | Ag40—O12                                 | 2.463 (19)  |
| Ag1—Ag38                                                   | 2.902 (3)   | Ag40—S37                                 | 2.480 (6)   |
| Ag1—Ag51                                                   | 2.769 (3)   | Ag40—S38                                 | 2.557 (7)   |
| Ag1—O76                                                    | 2.297 (18)  | Ag40—S44                                 | 2.694 (5)   |
| Ag1—S43                                                    | 2.333 (9)   | Ag41—O33                                 | 2.576 (13)  |

|          |             |           |            |
|----------|-------------|-----------|------------|
| Ag1—S61  | 2.622 (8)   | Ag41—S21  | 2.411 (6)  |
| Ag2—Ag31 | 3.087 (5)   | Ag41—S50  | 2.419 (5)  |
| Ag2—Ag40 | 3.068 (6)   | Ag42—Ag53 | 3.370 (3)  |
| Ag2—Ag44 | 2.972 (5)   | Ag42—O49  | 2.510 (14) |
| Ag2—O80  | 2.29 (2)    | Ag42—O73  | 2.450 (16) |
| Ag2—S38  | 2.379 (10)  | Ag42—O77  | 2.374 (12) |
| Ag2—S41  | 2.834 (10)  | Ag42—S17  | 2.643 (5)  |
| Ag3—Ag17 | 3.075 (2)   | Ag42—S28  | 2.577 (6)  |
| Ag3—Ag60 | 3.1862 (19) | Ag43—Ag81 | 3.289 (2)  |
| Ag3—Ag87 | 3.045 (3)   | Ag43—O39  | 2.512 (11) |
| Ag3—O22  | 2.436 (12)  | Ag43—O46  | 2.337 (15) |
| Ag3—O27  | 2.323 (13)  | Ag43—O69  | 2.414 (15) |
| Ag3—S11  | 2.417 (5)   | Ag43—S34  | 2.646 (6)  |
| Ag3—S45  | 2.538 (5)   | Ag43—S63  | 2.551 (6)  |
| Ag4—Ag50 | 3.262 (2)   | Ag44—Ag49 | 3.193 (3)  |
| Ag4—Ag63 | 3.150 (2)   | Ag44—O34  | 2.356 (19) |
| Ag4—O24  | 2.460 (13)  | Ag44—O67  | 2.435 (17) |
| Ag4—O44  | 2.373 (12)  | Ag44—S41  | 2.429 (7)  |
| Ag4—S26  | 2.444 (5)   | Ag44—S42  | 2.557 (7)  |
| Ag4—S48  | 2.632 (5)   | Ag45—Ag65 | 3.365 (2)  |
| Ag5—Ag15 | 3.367 (2)   | Ag45—Ag70 | 3.160 (3)  |
| Ag5—Ag65 | 2.901 (2)   | Ag45—S4   | 2.395 (7)  |
| Ag5—O11  | 2.238 (13)  | Ag45—S57  | 2.442 (7)  |
| Ag5—O58  | 2.575 (12)  | Ag46—Ag82 | 3.119 (3)  |
| Ag5—O68  | 2.577 (12)  | Ag46—O23  | 2.465 (13) |
| Ag5—S43  | 2.488 (6)   | Ag46—O31  | 2.469 (17) |
| Ag6—Ag21 | 3.307 (2)   | Ag46—S36  | 2.446 (6)  |
| Ag6—Ag24 | 3.214 (3)   | Ag46—S63  | 2.544 (5)  |
| Ag6—Ag29 | 2.870 (3)   | Ag47—Ag48 | 2.856 (3)  |
| Ag6—O35  | 2.512 (16)  | Ag47—O35  | 2.599 (16) |
| Ag6—O63  | 2.400 (14)  | Ag47—S3   | 2.432 (5)  |
| Ag6—S12  | 2.422 (6)   | Ag47—S5   | 2.471 (5)  |
| Ag6—S47  | 2.569 (5)   | Ag48—Ag51 | 3.350 (3)  |
| Ag7—Ag16 | 2.854 (2)   | Ag48—O11  | 2.440 (12) |
| Ag7—Ag71 | 3.127 (2)   | Ag48—O51  | 2.536 (14) |
| Ag7—O48  | 2.437 (12)  | Ag48—S5   | 2.526 (5)  |
| Ag7—O55  | 2.402 (13)  | Ag48—S61  | 2.458 (7)  |
| Ag7—S50  | 2.385 (5)   | Ag49—Ag53 | 3.250 (3)  |
| Ag7—S52  | 2.508 (5)   | Ag49—S13  | 2.392 (6)  |
| Ag8—Ag9  | 2.877 (2)   | Ag49—S41  | 2.418 (7)  |
| Ag8—Ag14 | 3.242 (2)   | Ag50—Ag72 | 2.972 (2)  |
| Ag8—O15  | 2.491 (14)  | Ag50—O42  | 2.213 (16) |
| Ag8—O79  | 2.449 (12)  | Ag50—S26  | 2.514 (5)  |

|           |            |           |            |
|-----------|------------|-----------|------------|
| Ag8—S26   | 2.447 (5)  | Ag50—S31  | 2.505 (7)  |
| Ag8—S28   | 2.550 (5)  | Ag51—O8   | 2.412 (18) |
| Ag9—Ag27  | 2.866 (2)  | Ag51—S4   | 2.502 (6)  |
| Ag9—Ag73  | 2.866 (2)  | Ag51—S6   | 2.663 (4)  |
| Ag9—O1    | 2.58 (3)   | Ag51—S61  | 2.561 (6)  |
| Ag9—S9    | 2.418 (5)  | Ag52—O71  | 2.518 (13) |
| Ag9—S28   | 2.450 (5)  | Ag52—O73  | 2.427 (15) |
| Ag10—Ag54 | 3.171 (3)  | Ag52—S38  | 2.424 (8)  |
| Ag10—Ag57 | 3.001 (3)  | Ag52—S54  | 2.535 (5)  |
| Ag10—Ag68 | 3.234 (2)  | Ag53—Ag78 | 2.949 (3)  |
| Ag10—O19  | 2.438 (13) | Ag53—O18  | 2.511 (13) |
| Ag10—O32  | 2.336 (13) | Ag53—O49  | 2.586 (16) |
| Ag10—S51  | 2.553 (4)  | Ag53—O73  | 2.334 (17) |
| Ag10—S56  | 2.406 (5)  | Ag53—S41  | 2.428 (8)  |
| Ag11—Ag19 | 3.352 (2)  | Ag54—S32  | 2.425 (6)  |
| Ag11—O41  | 2.450 (14) | Ag54—S56  | 2.452 (8)  |
| Ag11—O70  | 2.556 (12) | Ag55—Ag72 | 3.301 (3)  |
| Ag11—O79  | 2.482 (14) | Ag55—S27  | 2.427 (7)  |
| Ag11—S9   | 2.592 (5)  | Ag55—S31  | 2.456 (7)  |
| Ag11—S49  | 2.619 (5)  | Ag56—Ag57 | 2.907 (3)  |
| Ag12—Ag36 | 3.125 (2)  | Ag56—Ag84 | 3.291 (3)  |
| Ag12—Ag73 | 2.887 (2)  | Ag56—O61  | 2.56 (3)   |
| Ag12—O43  | 2.478 (12) | Ag56—S22  | 2.549 (6)  |
| Ag12—O83  | 2.442 (12) | Ag56—S35  | 2.476 (6)  |
| Ag12—S9   | 2.539 (5)  | Ag56—S46  | 2.675 (5)  |
| Ag12—S58  | 2.484 (6)  | Ag57—Ag81 | 3.376 (4)  |
| Ag13—Ag71 | 3.380 (2)  | Ag57—O56  | 2.34 (3)   |
| Ag13—O10  | 2.450 (12) | Ag57—S22  | 2.497 (7)  |
| Ag13—O14  | 2.542 (15) | Ag57—S56  | 2.547 (9)  |
| Ag13—O40  | 2.495 (11) | Ag58—Ag82 | 2.868 (3)  |
| Ag13—S14  | 2.639 (5)  | Ag58—O7   | 2.24 (2)   |
| Ag13—S47  | 2.558 (5)  | Ag58—S30  | 2.516 (7)  |
| Ag14—Ag19 | 3.355 (3)  | Ag58—S36  | 2.505 (7)  |
| Ag14—Ag50 | 2.873 (2)  | Ag59—Ag83 | 3.302 (3)  |
| Ag14—O9   | 2.465 (15) | Ag59—S35  | 2.397 (6)  |
| Ag14—S13  | 2.499 (6)  | Ag59—S43  | 2.391 (7)  |
| Ag14—S17  | 2.691 (5)  | Ag60—Ag62 | 3.134 (2)  |
| Ag14—S26  | 2.601 (5)  | Ag60—Ag67 | 3.202 (2)  |
| Ag15—O11  | 2.500 (13) | Ag60—O22  | 2.394 (11) |
| Ag15—O45  | 2.359 (15) | Ag60—O27  | 2.482 (12) |
| Ag15—O68  | 2.509 (14) | Ag60—O50  | 2.431 (13) |
| Ag15—S3   | 2.574 (6)  | Ag60—O52  | 2.431 (14) |
| Ag15—S46  | 2.640 (5)  | Ag60—O57  | 2.304 (12) |



|           |            |           |             |
|-----------|------------|-----------|-------------|
| Ag16—Ag17 | 3.271 (2)  | Ag61—Ag65 | 3.118 (2)   |
| Ag16—Ag77 | 3.192 (2)  | Ag61—Ag70 | 3.255 (2)   |
| Ag16—Ag79 | 3.321 (2)  | Ag61—Ag74 | 3.121 (2)   |
| Ag16—O14  | 2.280 (12) | Ag61—O16  | 2.418 (15)  |
| Ag16—O40  | 2.521 (12) | Ag61—O37  | 2.418 (11)  |
| Ag16—S11  | 2.492 (5)  | Ag61—O45  | 2.402 (17)  |
| Ag17—S11  | 2.449 (6)  | Ag61—O53  | 2.444 (16)  |
| Ag17—S15  | 2.406 (5)  | Ag61—O58  | 2.366 (14)  |
| Ag18—Ag34 | 3.155 (2)  | Ag62—O27  | 2.383 (12)  |
| Ag18—O28  | 2.48 (2)   | Ag62—O57  | 2.381 (13)  |
| Ag18—O46  | 2.366 (14) | Ag62—S8   | 2.538 (5)   |
| Ag18—S61  | 2.442 (5)  | Ag62—S15  | 2.404 (5)   |
| Ag18—S64  | 2.622 (6)  | Ag63—Ag69 | 3.367 (2)   |
| Ag19—Ag39 | 2.909 (2)  | Ag63—Ag72 | 3.226 (2)   |
| Ag19—Ag50 | 3.351 (3)  | Ag63—O6   | 2.310 (14)  |
| Ag19—O29  | 2.592 (14) | Ag63—O24  | 2.379 (15)  |
| Ag19—O70  | 2.506 (12) | Ag63—O26  | 2.399 (13)  |
| Ag19—O79  | 2.291 (13) | Ag63—O44  | 2.374 (14)  |
| Ag19—S31  | 2.484 (5)  | Ag63—O78  | 2.470 (14)  |
| Ag20—Ag28 | 3.232 (2)  | Ag64—Ag68 | 3.3722 (19) |
| Ag20—Ag78 | 3.136 (2)  | Ag64—O5   | 2.385 (12)  |
| Ag20—Ag85 | 3.175 (2)  | Ag64—O23  | 2.476 (16)  |
| Ag20—O18  | 2.279 (14) | Ag64—O60  | 2.501 (12)  |
| Ag20—O21  | 2.307 (14) | Ag64—S44  | 2.658 (5)   |
| Ag20—O54  | 2.507 (14) | Ag64—S54  | 2.573 (5)   |
| Ag20—O62  | 2.378 (16) | Ag65—O16  | 2.431 (13)  |
| Ag20—O77  | 2.463 (13) | Ag65—O58  | 2.401 (12)  |
| Ag21—Ag45 | 3.161 (3)  | Ag65—S4   | 2.388 (5)   |
| Ag21—Ag62 | 2.881 (2)  | Ag65—S19  | 2.533 (5)   |
| Ag21—Ag66 | 3.376 (3)  | Ag66—O52  | 2.371 (12)  |
| Ag21—O57  | 2.561 (11) | Ag66—O63  | 2.441 (16)  |
| Ag21—O63  | 2.299 (14) | Ag66—O65  | 2.544 (13)  |
| Ag21—O65  | 2.539 (15) | Ag66—S5   | 2.572 (5)   |
| Ag21—S57  | 2.440 (6)  | Ag66—S6   | 2.625 (4)   |
| Ag22—Ag41 | 3.248 (2)  | Ag67—Ag87 | 3.150 (3)   |
| Ag22—Ag71 | 3.200 (2)  | Ag67—O22  | 2.454 (12)  |
| Ag22—Ag86 | 3.222 (2)  | Ag67—O52  | 2.443 (12)  |
| Ag22—O17  | 2.411 (12) | Ag67—S7   | 2.596 (5)   |
| Ag22—O55  | 2.353 (14) | Ag67—S16  | 2.488 (5)   |
| Ag22—S20  | 2.568 (5)  | Ag68—O5   | 2.467 (14)  |
| Ag22—S21  | 2.431 (6)  | Ag68—O19  | 2.306 (13)  |
| Ag23—Ag35 | 2.890 (2)  | Ag68—O30  | 2.284 (14)  |
| Ag23—Ag68 | 3.110 (2)  | Ag68—O32  | 2.541 (14)  |

|           |            |           |            |
|-----------|------------|-----------|------------|
| Ag23—O30  | 2.428 (15) | Ag68—O66  | 2.430 (13) |
| Ag23—O32  | 2.345 (13) | Ag69—O33  | 2.502 (11) |
| Ag23—S29  | 2.514 (5)  | Ag69—O44  | 2.402 (13) |
| Ag23—S32  | 2.402 (5)  | Ag69—O83  | 2.453 (12) |
| Ag24—Ag88 | 2.896 (3)  | Ag69—S10  | 2.647 (5)  |
| Ag24—O36  | 2.433 (17) | Ag69—S18  | 2.568 (5)  |
| Ag24—S12  | 2.604 (6)  | Ag70—Ag88 | 2.908 (3)  |
| Ag24—S14  | 2.707 (5)  | Ag70—O16  | 2.308 (13) |
| Ag24—S15  | 2.491 (5)  | Ag70—O53  | 2.446 (17) |
| Ag25—Ag37 | 2.875 (2)  | Ag70—S55  | 2.536 (5)  |
| Ag25—Ag47 | 2.851 (2)  | Ag70—S57  | 2.408 (5)  |
| Ag25—Ag84 | 2.884 (2)  | Ag71—Ag76 | 3.161 (2)  |
| Ag25—S3   | 2.477 (5)  | Ag71—O10  | 2.396 (12) |
| Ag25—S63  | 2.457 (5)  | Ag71—O13  | 2.418 (15) |
| Ag26—Ag31 | 3.116 (2)  | Ag71—O17  | 2.460 (13) |
| Ag26—Ag39 | 3.127 (2)  | Ag71—O48  | 2.346 (13) |
| Ag26—Ag44 | 3.226 (2)  | Ag71—O55  | 2.403 (13) |
| Ag26—O29  | 2.372 (12) | Ag72—O24  | 2.408 (16) |
| Ag26—O34  | 2.469 (17) | Ag72—O78  | 2.413 (14) |
| Ag26—O41  | 2.401 (15) | Ag72—S1   | 2.555 (5)  |
| Ag26—O67  | 2.459 (16) | Ag72—S31  | 2.426 (5)  |
| Ag26—O82  | 2.412 (15) | Ag73—Ag75 | 2.859 (2)  |
| Ag27—Ag37 | 2.845 (3)  | Ag73—O4   | 2.58 (3)   |
| Ag27—Ag52 | 2.880 (3)  | Ag73—O15  | 2.577 (14) |
| Ag27—S28  | 2.440 (5)  | Ag73—S9   | 2.482 (5)  |
| Ag27—S54  | 2.464 (4)  | Ag73—S18  | 2.463 (5)  |
| Ag28—Ag33 | 3.306 (3)  | Ag74—Ag88 | 3.254 (3)  |
| Ag28—Ag58 | 2.952 (3)  | Ag74—O45  | 2.417 (16) |
| Ag28—O21  | 2.440 (12) | Ag74—O53  | 2.475 (16) |
| Ag28—O54  | 2.360 (15) | Ag74—S12  | 2.454 (5)  |
| Ag28—S25  | 2.547 (5)  | Ag74—S59  | 2.614 (6)  |
| Ag28—S30  | 2.424 (5)  | Ag75—Ag79 | 2.910 (2)  |
| Ag29—Ag47 | 2.862 (2)  | Ag75—O43  | 2.564 (13) |
| Ag29—Ag75 | 2.847 (2)  | Ag75—S18  | 2.466 (5)  |
| Ag29—O3   | 2.52 (4)   | Ag75—S47  | 2.446 (5)  |
| Ag29—S5   | 2.449 (5)  | Ag76—Ag86 | 3.126 (2)  |
| Ag29—S47  | 2.467 (5)  | Ag76—O10  | 2.374 (13) |
| Ag30—Ag63 | 3.099 (2)  | Ag76—O17  | 2.413 (11) |
| Ag30—Ag80 | 2.901 (2)  | Ag76—S24  | 2.596 (5)  |
| Ag30—O6   | 2.514 (15) | Ag76—S58  | 2.440 (5)  |
| Ag30—O78  | 2.367 (14) | Ag77—Ag79 | 3.121 (2)  |
| Ag30—S27  | 2.402 (6)  | Ag77—Ag87 | 3.035 (3)  |
| Ag30—S60  | 2.532 (6)  | Ag77—O75  | 2.446 (17) |

|           |            |           |            |
|-----------|------------|-----------|------------|
| Ag31—O41  | 2.349 (15) | Ag77—S10  | 2.822 (5)  |
| Ag31—O67  | 2.470 (18) | Ag77—S16  | 2.535 (5)  |
| Ag31—S38  | 2.448 (6)  | Ag77—S50  | 2.465 (5)  |
| Ag31—S40  | 2.611 (6)  | Ag78—O18  | 2.424 (12) |
| Ag32—Ag57 | 3.141 (3)  | Ag78—O54  | 2.387 (13) |
| Ag32—Ag68 | 3.181 (2)  | Ag78—S37  | 2.398 (5)  |
| Ag32—O5   | 2.348 (13) | Ag78—S53  | 2.534 (5)  |
| Ag32—O19  | 2.457 (12) | Ag79—O14  | 2.426 (14) |
| Ag32—S22  | 2.455 (5)  | Ag79—O20  | 2.464 (13) |
| Ag32—S23  | 2.636 (5)  | Ag79—S16  | 2.445 (5)  |
| Ag33—Ag35 | 3.377 (3)  | Ag79—S18  | 2.545 (5)  |
| Ag33—Ag78 | 3.347 (2)  | Ag80—Ag86 | 3.054 (2)  |
| Ag33—O60  | 2.598 (12) | Ag80—O33  | 2.577 (12) |
| Ag33—S30  | 2.393 (7)  | Ag80—O83  | 2.287 (14) |
| Ag33—S37  | 2.400 (7)  | Ag80—S21  | 2.559 (6)  |
| Ag34—Ag38 | 3.214 (2)  | Ag81—Ag83 | 2.932 (3)  |
| Ag34—Ag83 | 3.105 (2)  | Ag81—O38  | 2.561 (16) |
| Ag34—O25  | 2.513 (18) | Ag81—O39  | 2.533 (15) |
| Ag34—O28  | 2.306 (16) | Ag81—O69  | 2.234 (14) |
| Ag34—O38  | 2.251 (14) | Ag81—S56  | 2.459 (5)  |
| Ag34—O46  | 2.464 (16) | Ag82—O81  | 2.495 (19) |
| Ag34—O72  | 2.394 (15) | Ag82—S32  | 2.464 (5)  |
| Ag35—Ag58 | 3.212 (3)  | Ag82—S34  | 2.670 (6)  |
| Ag35—Ag82 | 3.206 (3)  | Ag82—S36  | 2.556 (6)  |
| Ag35—O23  | 2.234 (15) | Ag83—O25  | 2.378 (18) |
| Ag35—S30  | 2.493 (6)  | Ag83—O38  | 2.416 (15) |
| Ag36—Ag80 | 3.164 (3)  | Ag83—S35  | 2.423 (6)  |
| Ag36—Ag86 | 2.873 (3)  | Ag83—S62  | 2.544 (7)  |
| Ag36—O74  | 2.408 (16) | Ag84—O47  | 2.449 (13) |
| Ag36—S27  | 2.471 (6)  | Ag84—O69  | 2.472 (14) |
| Ag36—S49  | 2.742 (5)  | Ag84—S3   | 2.536 (5)  |
| Ag36—S58  | 2.561 (6)  | Ag84—S22  | 2.482 (5)  |
| Ag37—Ag46 | 2.899 (3)  | Ag85—O21  | 2.471 (13) |
| Ag37—O47  | 2.558 (15) | Ag85—O77  | 2.303 (14) |
| Ag37—S54  | 2.444 (5)  | Ag85—S33  | 2.614 (5)  |
| Ag37—S63  | 2.455 (6)  | Ag85—S36  | 2.440 (6)  |
| Ag38—O25  | 2.358 (16) | Ag86—O59  | 2.254 (19) |
| Ag38—O28  | 2.41 (2)   | Ag86—S21  | 2.487 (6)  |
| Ag38—S39  | 2.552 (6)  | Ag86—S58  | 2.534 (6)  |
| Ag38—S43  | 2.466 (6)  | Ag87—N1   | 2.45 (3)   |
| Ag39—Ag49 | 3.349 (3)  | Ag87—O84  | 2.33 (2)   |
| Ag39—O29  | 2.377 (14) | Ag87—S11  | 2.544 (7)  |
| Ag39—O34  | 2.427 (16) | Ag87—S16  | 2.628 (6)  |

|             |             |              |             |
|-------------|-------------|--------------|-------------|
| Ag39—S2     | 2.546 (6)   | Ag88—O64     | 2.247 (19)  |
| Ag39—S13    | 2.410 (5)   | Ag88—S12     | 2.502 (7)   |
| Ag40—Ag52   | 3.256 (3)   | Ag88—S57     | 2.604 (8)   |
| O76—Ag1—S43 | 123.7 (6)   | S41—Ag44—O67 | 114.5 (5)   |
| O76—Ag1—S61 | 109.7 (6)   | S41—Ag44—S42 | 149.0 (2)   |
| S43—Ag1—S61 | 126.6 (2)   | S4—Ag45—S57  | 167.4 (2)   |
| O80—Ag2—S38 | 123.5 (6)   | O23—Ag46—O31 | 91.0 (5)    |
| O80—Ag2—S41 | 104.8 (7)   | O23—Ag46—S63 | 108.3 (4)   |
| S38—Ag2—S41 | 109.6 (3)   | O31—Ag46—S63 | 113.2 (4)   |
| O22—Ag3—S45 | 77.1 (3)    | S36—Ag46—O23 | 117.3 (4)   |
| O27—Ag3—O22 | 88.4 (4)    | S36—Ag46—O31 | 89.4 (4)    |
| O27—Ag3—S11 | 135.8 (3)   | S36—Ag46—S63 | 128.49 (19) |
| O27—Ag3—S45 | 76.6 (3)    | S3—Ag47—O35  | 98.1 (4)    |
| S11—Ag3—O22 | 111.6 (3)   | S3—Ag47—S5   | 164.97 (19) |
| S11—Ag3—S45 | 144.51 (16) | S5—Ag47—O35  | 81.5 (4)    |
| O24—Ag4—S48 | 73.9 (4)    | O11—Ag48—O51 | 92.3 (4)    |
| O44—Ag4—O24 | 86.1 (5)    | O11—Ag48—S5  | 107.9 (3)   |
| O44—Ag4—S26 | 155.5 (3)   | O11—Ag48—S61 | 114.0 (4)   |
| O44—Ag4—S48 | 75.7 (3)    | S5—Ag48—Ag51 | 117.82 (14) |
| S26—Ag4—O24 | 113.8 (4)   | S5—Ag48—O51  | 119.1 (4)   |
| S26—Ag4—S48 | 122.16 (17) | S61—Ag48—O51 | 87.7 (3)    |
| O11—Ag5—O58 | 86.9 (4)    | S61—Ag48—S5  | 128.70 (18) |
| O11—Ag5—O68 | 84.8 (5)    | S13—Ag49—S41 | 171.9 (2)   |
| O11—Ag5—S43 | 168.2 (4)   | O42—Ag50—S26 | 111.5 (5)   |
| O58—Ag5—O68 | 82.1 (4)    | O42—Ag50—S31 | 120.6 (6)   |
| S43—Ag5—O58 | 104.3 (3)   | S31—Ag50—S26 | 124.68 (18) |
| S43—Ag5—O68 | 92.9 (3)    | O8—Ag51—S4   | 104.8 (6)   |
| O35—Ag6—S47 | 113.5 (4)   | O8—Ag51—S6   | 93.8 (4)    |
| O63—Ag6—O35 | 93.9 (5)    | O8—Ag51—S61  | 99.3 (6)    |
| O63—Ag6—S12 | 128.2 (4)   | S4—Ag51—S6   | 97.29 (18)  |
| O63—Ag6—S47 | 105.0 (3)   | S4—Ag51—S61  | 145.67 (18) |
| S12—Ag6—O35 | 90.3 (4)    | S61—Ag51—S6  | 105.17 (18) |
| S12—Ag6—S47 | 120.14 (18) | O71—Ag52—S54 | 111.8 (4)   |
| O48—Ag7—S52 | 79.4 (3)    | O73—Ag52—O71 | 94.6 (5)    |
| O55—Ag7—O48 | 89.6 (4)    | O73—Ag52—S54 | 103.5 (4)   |
| O55—Ag7—S52 | 78.4 (3)    | S38—Ag52—O71 | 92.9 (3)    |
| S50—Ag7—O48 | 129.1 (3)   | S38—Ag52—O73 | 123.1 (5)   |
| S50—Ag7—O55 | 119.7 (4)   | S38—Ag52—S54 | 125.2 (2)   |
| S50—Ag7—S52 | 142.46 (17) | O18—Ag53—O49 | 86.3 (4)    |
| O15—Ag8—S28 | 119.4 (3)   | O73—Ag53—O18 | 88.4 (5)    |
| O79—Ag8—O15 | 91.3 (5)    | O73—Ag53—O49 | 82.3 (5)    |
| O79—Ag8—S28 | 103.1 (3)   | O73—Ag53—S41 | 162.0 (4)   |
| S26—Ag8—O15 | 88.8 (3)    | S41—Ag53—O18 | 109.4 (4)   |

|              |             |              |             |
|--------------|-------------|--------------|-------------|
| S26—Ag8—O79  | 118.6 (4)   | S41—Ag53—O49 | 96.0 (4)    |
| S26—Ag8—S28  | 129.25 (17) | S32—Ag54—S56 | 160.2 (3)   |
| S9—Ag9—O1    | 92.5 (7)    | S27—Ag55—S31 | 158.9 (2)   |
| S9—Ag9—S28   | 166.17 (19) | O61—Ag56—S46 | 91.4 (6)    |
| S28—Ag9—O1   | 101.2 (7)   | S22—Ag56—O61 | 97.6 (7)    |
| O19—Ag10—S51 | 75.5 (3)    | S22—Ag56—S46 | 108.42 (19) |
| O32—Ag10—O19 | 85.9 (5)    | S35—Ag56—O61 | 100.2 (7)   |
| O32—Ag10—S51 | 78.5 (3)    | S35—Ag56—S22 | 143.0 (2)   |
| O32—Ag10—S56 | 130.3 (4)   | S35—Ag56—S46 | 103.26 (19) |
| S56—Ag10—O19 | 122.1 (4)   | O56—Ag57—S22 | 112.7 (8)   |
| S56—Ag10—S51 | 143.36 (18) | O56—Ag57—S56 | 116.1 (8)   |
| O41—Ag11—O70 | 146.5 (5)   | S22—Ag57—S56 | 126.3 (2)   |
| O41—Ag11—O79 | 113.7 (4)   | O7—Ag58—S30  | 120.6 (7)   |
| O41—Ag11—S9  | 114.3 (4)   | O7—Ag58—S36  | 111.3 (7)   |
| O41—Ag11—S49 | 72.9 (4)    | S36—Ag58—S30 | 126.6 (2)   |
| O70—Ag11—S9  | 91.1 (3)    | S43—Ag59—S35 | 168.4 (3)   |
| O70—Ag11—S49 | 77.6 (3)    | O22—Ag60—O27 | 85.8 (4)    |
| O79—Ag11—O70 | 80.7 (4)    | O22—Ag60—O50 | 78.3 (4)    |
| O79—Ag11—S9  | 100.0 (3)   | O22—Ag60—O52 | 89.4 (4)    |
| O79—Ag11—S49 | 141.7 (3)   | O50—Ag60—O27 | 100.5 (5)   |
| S9—Ag11—S49  | 111.60 (17) | O52—Ag60—O27 | 172.5 (4)   |
| O43—Ag12—S9  | 120.7 (3)   | O52—Ag60—O50 | 84.1 (5)    |
| O43—Ag12—S58 | 84.7 (3)    | O57—Ag60—O22 | 172.4 (4)   |
| O83—Ag12—O43 | 90.8 (4)    | O57—Ag60—O27 | 89.2 (4)    |
| O83—Ag12—S9  | 107.5 (3)   | O57—Ag60—O50 | 108.3 (4)   |
| O83—Ag12—S58 | 116.3 (3)   | O57—Ag60—O52 | 94.9 (4)    |
| S58—Ag12—S9  | 128.95 (17) | O16—Ag61—O37 | 93.9 (4)    |
| O10—Ag13—O14 | 112.8 (4)   | O16—Ag61—O53 | 84.3 (5)    |
| O10—Ag13—O40 | 151.8 (4)   | O37—Ag61—O53 | 82.0 (4)    |
| O10—Ag13—S14 | 73.5 (3)    | O45—Ag61—O16 | 174.3 (5)   |
| O10—Ag13—S47 | 113.4 (3)   | O45—Ag61—O37 | 89.2 (5)    |
| O14—Ag13—S14 | 142.0 (3)   | O45—Ag61—O53 | 91.4 (5)    |
| O14—Ag13—S47 | 96.5 (3)    | O58—Ag61—O16 | 91.4 (5)    |
| O40—Ag13—O14 | 78.8 (4)    | O58—Ag61—O37 | 102.2 (4)   |
| O40—Ag13—S14 | 82.0 (3)    | O58—Ag61—O45 | 92.7 (5)    |
| O40—Ag13—S47 | 89.5 (3)    | O58—Ag61—O53 | 174.2 (5)   |
| S47—Ag13—S14 | 115.77 (15) | O27—Ag62—S8  | 77.3 (3)    |
| O9—Ag14—S13  | 104.5 (5)   | O27—Ag62—S15 | 118.0 (3)   |
| O9—Ag14—S17  | 93.0 (3)    | O57—Ag62—O27 | 89.8 (4)    |
| O9—Ag14—S26  | 96.5 (5)    | O57—Ag62—S8  | 78.2 (3)    |
| S13—Ag14—S17 | 98.64 (17)  | O57—Ag62—S15 | 128.7 (3)   |
| S13—Ag14—S26 | 144.79 (18) | S15—Ag62—S8  | 145.79 (18) |
| S26—Ag14—S17 | 108.27 (16) | O6—Ag63—O24  | 171.9 (5)   |

|              |             |              |             |
|--------------|-------------|--------------|-------------|
| O11—Ag15—O68 | 81.1 (4)    | O6—Ag63—O26  | 106.4 (5)   |
| O11—Ag15—S3  | 101.2 (3)   | O6—Ag63—O44  | 93.1 (5)    |
| O11—Ag15—S46 | 136.7 (3)   | O6—Ag63—O78  | 92.6 (5)    |
| O45—Ag15—O11 | 113.5 (5)   | O24—Ag63—O26 | 81.7 (5)    |
| O45—Ag15—O68 | 147.1 (5)   | O24—Ag63—O78 | 85.5 (5)    |
| O45—Ag15—S3  | 112.9 (4)   | O26—Ag63—O78 | 97.8 (5)    |
| O45—Ag15—S46 | 73.5 (4)    | O44—Ag63—O24 | 88.0 (5)    |
| O68—Ag15—S3  | 91.4 (3)    | O44—Ag63—O26 | 87.6 (5)    |
| O68—Ag15—S46 | 76.1 (3)    | O44—Ag63—O78 | 170.8 (4)   |
| S3—Ag15—S46  | 115.40 (16) | O5—Ag64—O23  | 114.6 (5)   |
| O14—Ag16—O40 | 83.3 (5)    | O5—Ag64—O60  | 150.9 (4)   |
| O14—Ag16—S11 | 167.6 (4)   | O5—Ag64—S44  | 74.3 (3)    |
| S11—Ag16—O40 | 94.4 (3)    | O5—Ag64—S54  | 111.1 (3)   |
| S15—Ag17—S11 | 170.93 (18) | O23—Ag64—O60 | 78.4 (5)    |
| O28—Ag18—S64 | 74.8 (4)    | O23—Ag64—S44 | 138.7 (4)   |
| O46—Ag18—O28 | 87.4 (6)    | O23—Ag64—S54 | 100.2 (3)   |
| O46—Ag18—S61 | 159.3 (4)   | O60—Ag64—S44 | 79.2 (3)    |
| O46—Ag18—S64 | 76.6 (3)    | O60—Ag64—S54 | 90.6 (3)    |
| S61—Ag18—O28 | 108.9 (5)   | S54—Ag64—S44 | 114.28 (17) |
| S61—Ag18—S64 | 119.28 (18) | O16—Ag65—S19 | 76.6 (3)    |
| O70—Ag19—O29 | 81.3 (4)    | O58—Ag65—O16 | 90.2 (5)    |
| O79—Ag19—O29 | 88.1 (4)    | O58—Ag65—S19 | 78.1 (3)    |
| O79—Ag19—O70 | 85.6 (5)    | S4—Ag65—O16  | 119.8 (4)   |
| O79—Ag19—S31 | 167.5 (3)   | S4—Ag65—O58  | 132.1 (3)   |
| S31—Ag19—O29 | 104.4 (3)   | S4—Ag65—S19  | 140.90 (18) |
| S31—Ag19—O70 | 94.8 (3)    | O52—Ag66—O63 | 111.9 (4)   |
| O18—Ag20—O21 | 174.0 (5)   | O52—Ag66—O65 | 148.3 (5)   |
| O18—Ag20—O54 | 91.7 (5)    | O52—Ag66—S5  | 117.2 (4)   |
| O18—Ag20—O62 | 104.9 (5)   | O52—Ag66—S6  | 73.8 (3)    |
| O18—Ag20—O77 | 96.2 (5)    | O63—Ag66—O65 | 79.9 (5)    |
| O21—Ag20—O54 | 85.3 (5)    | O63—Ag66—S5  | 98.3 (4)    |
| O21—Ag20—O62 | 80.5 (5)    | O63—Ag66—S6  | 137.4 (4)   |
| O21—Ag20—O77 | 86.7 (4)    | O65—Ag66—S5  | 88.5 (4)    |
| O62—Ag20—O54 | 94.8 (5)    | O65—Ag66—S6  | 78.0 (3)    |
| O62—Ag20—O77 | 84.2 (5)    | S5—Ag66—S6   | 116.93 (16) |
| O77—Ag20—O54 | 172.0 (5)   | O22—Ag67—S7  | 74.2 (3)    |
| O63—Ag21—O57 | 87.8 (5)    | O22—Ag67—S16 | 114.6 (3)   |
| O63—Ag21—O65 | 82.7 (5)    | O52—Ag67—O22 | 87.7 (4)    |

**Supplementary Table 3:** The assigned formulae of species found in ESI-MS of **SD/Ag88a** dissolved in CH<sub>2</sub>Cl<sub>2</sub>.

|           | Species                                                                                                 | Exp.     | Sim.     |
|-----------|---------------------------------------------------------------------------------------------------------|----------|----------|
| <b>1a</b> | $[(\text{CrO}_4)_4@Ag_{42}(\text{TC4A})_4(\text{EtS})_{14}(\text{OAc})(\text{CH}_2\text{Cl}_2)]^{3+}$   | 2953.884 | 2953.887 |
| <b>1b</b> | $[(\text{CrO}_4)_4@Ag_{43}(\text{TC4A})_4(\text{EtS})_{16}]^{3+}$                                       | 2982.523 | 2982.541 |
| <b>1c</b> | $[(\text{CrO}_4)_4@Ag_{43}(\text{TC4A})_4(\text{EtS})_{14}(\text{OAc})_2(\text{CH}_2\text{Cl}_2)]^{3+}$ | 3009.850 | 3009.859 |
| <b>1d</b> | $[(\text{CrO}_4)_4@Ag_{44}(\text{TC4A})_4(\text{EtS})_{16}(\text{OAc})]^{3+}$                           | 3038.487 | 3038.513 |
| <b>1e</b> | $[(\text{CrO}_4)_4@Ag_{45}(\text{TC4A})_4(\text{EtS})_{16}(\text{OAc})_2]^{3+}$                         | 3093.784 | 3093.819 |
| <b>1f</b> | $[(\text{CrO}_4)_4@Ag_{43}(\text{TC4A})_4(\text{EtS})_{16}(\text{OAc})]^{2+}$                           | 4503.247 | 4503.318 |
| <b>1g</b> | $[(\text{CrO}_4)_4@Ag_{44}(\text{TC4A})_4(\text{EtS})_{16}(\text{OAc})_2]^{2+}$                         | 4587.207 | 4587.277 |

## Supplementary References

- 1) Wang, Z. *et al.* Enclosing classical polyoxometallates in silver nanoclusters. *Nanoscale* **11**, 10927-10931 (2019).
- 2) Iki, N. *et al.* Synthesis of p-tert-butylthiacalix 4 arene and its inclusion property. *Tetrahedron* **56**, 1437-1443 (2000).
- 3) Rigaku Oxford Diffraction. *CrysAlis<sup>Pro</sup> Software system, version 1.171.40.25a*, Rigaku Corporation: Oxford, UK, (2018).
- 4) Palatinus, L. & Chapuis, G. SUPERFLIP - a computer program for the solution of crystal structures by charge flipping in arbitrary dimensions. *J Appl Crystallogr* **40**, 786-790 (2007).
- 5) Sheldrick, G.M. Crystal structure refinement with SHELXL. *Acta Crystallographica Section C-Structural Chemistry* **71**, 3-8 (2015).
- 6) Dolomanov, O.V., Bourhis, L.J., Gildea, R.J., Howard, J.A.K. & Puschmann, H. OLEX2: a complete structure solution, refinement and analysis program. *J Appl Crystallogr* **42**, 339-341 (2009).
- 7) Spek, A.L. Structure validation in chemical crystallography. *Acta Crystallogr D* **65**, 148-155 (2009).
- 8) Voss, N.R. & Gerstein, M. 3V: cavity, channel and cleft volume calculator and extractor. *Nucleic Acids Res* **38**, W555-W562 (2010).
- 9) Turner, M. *et al.* CrystalExplorer17. University of Western Australia, Nedlands, Western Australia. <http://hirshfeldsurface.net>. (2017).
